1

2

3

## 4 **Optimal fertigation for high yield and fruit quality of greenhouse strawberry**

5

6

7 **Wu Yong<sup>1</sup>, Li Li<sup>2\*</sup>, Li Minzan<sup>1\*</sup>, Zhang Man<sup>1</sup>, Sun Hong<sup>1</sup>, Nikolaos Sygrymis<sup>3</sup>**

8

9

10

11 <sup>1</sup> Key Laboratory of Modern Precision Agriculture System Integration Research, Ministry of Education, China

12 Agricultural University, Beijing, China

13 <sup>2</sup> Key Laboratory of Agricultural Information Acquisition Technology, Ministry of Agriculture and Rural Areas,

14 China Agricultural University, Beijing, China

15 <sup>3</sup> Department of Agricultural Engineering, Agricultural University of Athens, Athens, Greece

16

17

18

19 \* Corresponding author

20 E-mail: [lily@cau.edu.cn](mailto:lily@cau.edu.cn) (LL); [limz@cau.edu.cn](mailto:limz@cau.edu.cn) (LM)

## 21 **Abstract**

22 Nitrogen (N), phosphorus (P), potassium (K), and water are four crucial factors that have significant effects on strawberry yield  
23 and fruit quality. A quadratic regression orthogonal rotation combination experiment that involved 36 treatments with five  
24 levels of the four variables (N, P, and K fertilizers and water) was executed to optimize the fertilization and water combination  
25 for high yield and quality. SSC/TA ratio (the ratio of soluble solid content to titratable acid) was selected as the index of  
26 quality. Results showed that the N fertilizer was the most important factor, followed by water and P fertilizer, and the N  
27 fertilizer had a significant effect on yield and SSC/TA ratio. By contrast, the K fertilizer had a significant effect only on yield.  
28 N×K fertilizer interaction had a significant effect on yield, whereas the other interactions among the four factors had no  
29 significant effects on yield and SSC/TA ratio. The effects of the four factors on the yield and SSC/TA ratio were ranked as N  
30 fertilizer > water > K fertilizer > P fertilizer and N fertilizer > P fertilizer > water > K fertilizer, respectively. The yield and  
31 SSC/TA ratio increased and then decreased when NPK fertilizer and water increased. The optimal fertilizer and water  
32 combination was 22.28–24.61 g/plant  $\text{Ca}(\text{NO}_3)_2 \cdot 4\text{H}_2\text{O}$ , 1.75–2.03 g/plant  $\text{NaH}_2\text{PO}_4$ , 12.41–13.91 g/plant  $\text{K}_2\text{SO}_4$ , and 12.00–  
33 13.05 L/plant water for yields of more than 110 g/plant and optimal SSC/TA ratio of 8.5–14.

## 34 **Introduction**

35 Mineral fertilizers and water have a significant effect on crop yield [1–3]. However, the excessive application of fertilizers may  
36 lead to soil and water pollution and become a serious threat to food safety [4,5]. Meanwhile, water scarcity is now a major  
37 challenge in China [6]. Therefore, a good management of fertilization and water is increasingly required for agriculture in China.

38 Strawberry is one of the most profitable fruit cultivars in China, which ranks first in total strawberry production worldwide  
39 with a production of 1,801,865 tons in 2016, followed by United States and Mexico among a total of 79 countries [7]. Thus, large  
40 amounts of fertilizers and water are needed for strawberry production in China. Consumers prefer strawberries with a sweet taste  
41 [8,9]. The strawberry flavor is strongly correlated with the balance between the soluble solid content (SSC) and titratable acid  
42 (TA) in ripe fruits [10,11], which are common quality indexes to assess sweetness and sourness [12]. The ratio of SSC/TA is  
43 another effective parameter to determine fruit flavor [13,14]. The higher the SSC/TA ratio, the sweeter the fruit [15]. Therefore,  
44 increasing strawberry production and enhancing fruit quality with high SSC/TA ratio and without environment pollution are  
45 important goals in the field.

46 Nitrogen (N), phosphorus (P), and potassium (K) are primary mineral fertilizers. N is the most limiting nutrient to crop  
47 production because of its important role in cell division [16,17], and N deficiency can decrease crop yield and quality [18,19]. P  
48 nutrient is essential for photosynthesis [20], and it is required after emergence [21]. K is the second most abundant element in

49 plant tissues after N [22,23], and it helps enhance water uptake and grain quality [24]. In addition to mineral fertilizers, water  
50 greatly contributes to the strawberry fruit content and leaf development [25], and water shortages can lead to large losses of  
51 strawberries yield [26].

52 Although studies have shown that all mineral fertilizers (N, P, and K) and water have effects on the yield and quality of  
53 strawberries, most of them only focused on either the effect of water [26–28] or the effect of fertilization [29–33]. The combined  
54 application of N, P, and K (NPK) fertilizers and water for high yield and good fruit quality is rarely reported [27,31,34]. Thus,  
55 the interaction effect among N, P, and K fertilizers and water on the strawberry yield and fruit quality should be investigated.  
56 This study aimed to evaluate the influence of different levels of NPK fertilizers and water on the growth and fruit quality of  
57 strawberry and determine the optimal fertilization and water combination for high yield and good quality.

## 58 **Materials and methods**

### 59 **Experimental site and cultivar**

60 The experiment was conducted for 8 months from November 2016 to June 2017 in an east–west oriented solar greenhouse located  
61 in the Zhuozhou Experiment Center, China Agricultural University, China. The Chinese solar greenhouse, as a horticultural  
62 facility, is a kind of mono-slope greenhouse that provides effective energy use and is widely used in China, especially in the  
63 northern latitudes [35,36]. The structure of this solar greenhouse has a typical width, length, backwall height, and roof height of  
64 8, 50, 2.4, and 3.5 m, respectively (Fig 1).

#### 65 **Fig 1. Solar greenhouse block diagram.**

66 (A) Section view. (B) Top view.

67 The strawberry cultivar used was ‘Hongyan’, which has been studied extensively in China [37–40]. It was cultivated on  
68 substrate instead of soil in the solar greenhouse with natural light and temperature of 10 °C–26 °C. The substrate, with initial  
69 chemical characteristics shown in Table 1, was a mixture with a ratio of 10:2:1 rate of peat, vermiculite, and perlite, respectively.  
70 The substrate bags, with dimensions of 100 cm×40 cm×20 cm, were obtained from Beijing Greenovo Agriculture Science and  
71 Technology Co., Ltd., and every three strawberry plants were grown on each substrate bag (Fig 2). The strawberries were  
72 transplanted on November 3, 2016 and hand-harvested at the mature red stage. Thereafter, the fruits were transported to the  
73 laboratory within 2 h by using ice bags for cooling.

#### 74 **Fig 2. Strawberry plants grown on substrate bags.**

#### 75 **Table 1. Substrate chemical analysis (%)**

| Properties       | Fertility |
|------------------|-----------|
| Total Nitrogen   | 0.9705    |
| Total Phosphorus | 0.466     |

|           |      |
|-----------|------|
| Potassium | 1.07 |
|-----------|------|

## 76 Experimental method

77 To reveal the relationship between the NPK+water combination and the fruit yield and achieve the optimal combination, a  
 78 quadratic regression orthogonal rotation combination experiment was designed involving four factors at five levels in 36  
 79 treatments; this technique is currently the most effective method for multi-factor interaction effect analysis [41]. The four factors  
 80 were N, P, and K fertilizers and water, which were represented by  $x_1$ ,  $x_2$ ,  $x_3$ , and  $x_4$ , respectively. Calcium nitrate (Ca  
 81  $(\text{NO}_3)_2 \cdot 4\text{H}_2\text{O}$ ), sodium dihydrogen phosphate ( $\text{NaH}_2\text{PO}_4$ ), and potassium sulfate ( $\text{K}_2\text{SO}_4$ ), which were obtained from Shanghai  
 82 Wintong Chemicals Co., Ltd. with a purity of more than 99%, were used as the sources of N, P, and K, respectively. Tap water  
 83 was used as the source of water. The arrangement of these factors and the levels of variables chosen are shown in Table 2. All  
 84 treatments were arranged in a completely randomized block with three replications, and each treatment consisted of six plants.  
 85 A total of 648 plants grown in the experimental solar greenhouse were studied. All plants were fed with a mixture solution of the  
 86 NPK fertilizers and water weekly following each treatment arrangement 15 days after the transplant, and additional  
 87 macronutrients and micronutrients were also applied weekly with the same dosage for each treatment (Table 3). The treatment  
 88 details are presented in Table 4.

89 **Table 2. Design level of four variables in the quadratic regression orthogonal experiment**

| Variable X      | Changing interval $\Delta_j$ | Design level of variables ( $m_0 = 12, \gamma = 2$ ) |       |       |       |           |
|-----------------|------------------------------|------------------------------------------------------|-------|-------|-------|-----------|
|                 |                              | $-\gamma$                                            | -1    | 0     | +1    | $+\gamma$ |
| $x_1$ (g/plant) | 13.41                        | 12.57                                                | 16.77 | 20.96 | 25.15 | 29.34     |
| $x_2$ (g/plant) | 1.21                         | 1.14                                                 | 1.52  | 1.89  | 2.27  | 2.65      |
| $x_3$ (g/plant) | 4.78                         | 4.48                                                 | 5.98  | 7.48  | 8.97  | 10.47     |
| $x_4$ (L/plant) | 7.68                         | 7.20                                                 | 9.60  | 12.00 | 14.40 | 16.80     |

90 **Table 3. Additional macronutrients and micronutrients applied to each treatment with the same dosage**

| Fertilizers                                                         | Dosage (g/plant) |
|---------------------------------------------------------------------|------------------|
| $\text{MgSO}_4$                                                     | 4.43             |
| EDTA-2NaFe                                                          | 3.5461           |
| $\text{H}_3\text{BO}_3$                                             | 0.3381           |
| $\text{MnSO}_4 \cdot 4\text{H}_2\text{O}$                           | 0.2518           |
| $\text{ZnSO}_4 \cdot 7\text{H}_2\text{O}$                           | 0.0260           |
| $\text{CuSO}_4 \cdot 5\text{H}_2\text{O}$                           | 0.0095           |
| $(\text{NH}_4)_6\text{Mo}_7\text{O}_{24} \cdot 4\text{H}_2\text{O}$ | 0.0024           |

## 91 Measurement of yield and fruit quality traits

92 An analytical balance (0.01 g accuracy) was used to measure the fruit weight after the fruits were harvested. Parameters of the  
 93 fruit quality, namely, soluble solid content (SSC) and titratable acidity (TA), were measured after the fruits were transported to

94 the laboratory. SSC (%) was determined by a digital hand-held pocket refractometer (PAL-1, Atago, Japan), whereas TA (%)  
 95 was measured by neutralization to pH 7.0 with 0.1 N NaOH. Data were presented as percentages of malic acid.  
 96 **Table 4. Arrangement of variables in the quadratic regression orthogonal experiment and results of the**  
 97 **experiment**

| Treatments | $x_1$ | $x_2$ | $x_3$ | $x_4$ | $x_1$<br>$x_2$ | $x_1$<br>$x_3$ | $x_1$<br>$x_4$ | $x_2$<br>$x_3$ | $x_2$<br>$x_4$ | $x_3$<br>$x_4$ | $x_1x_1$ | $x_2x_2$ | $x_3x_3$ | $x_4x_4$ | Yield<br>g/plant | SSC<br>% | TA<br>% | SSC/<br>TA |
|------------|-------|-------|-------|-------|----------------|----------------|----------------|----------------|----------------|----------------|----------|----------|----------|----------|------------------|----------|---------|------------|
| 1          | 1     | 1     | 1     | 1     | 1              | 1              | 1              | 1              | 1              | 1              | 0.33     | 0.33     | 0.33     | 0.33     | 134.52           | 13.25    | 0.89    | 14.89      |
| 2          | 1     | 1     | 1     | -1    | 1              | 1              | -1             | 1              | -1             | -1             | 0.33     | 0.33     | 0.33     | 0.33     | 116.59           | 18.83    | 1.06    | 17.76      |
| 3          | 1     | 1     | -1    | 1     | 1              | -1             | 1              | -1             | 1              | -1             | 0.33     | 0.33     | 0.33     | 0.33     | 116.61           | 9.92     | 0.81    | 12.25      |
| 4          | 1     | 1     | -1    | -1    | 1              | -1             | -1             | -1             | -1             | 1              | 0.33     | 0.33     | 0.33     | 0.33     | 111.56           | 12.70    | 0.67    | 18.96      |
| 5          | 1     | -1    | 1     | 1     | -1             | 1              | -1             | -1             | 1              | 1              | 0.33     | 0.33     | 0.33     | 0.33     | 142.53           | 10.72    | 0.55    | 19.49      |
| 6          | 1     | -1    | 1     | -1    | -1             | 1              | -1             | -1             | 1              | -1             | 0.33     | 0.33     | 0.33     | 0.33     | 126.78           | 22.92    | 1.02    | 22.47      |
| 7          | 1     | -1    | -1    | 1     | -1             | -1             | 1              | 1              | -1             | -1             | 0.33     | 0.33     | 0.33     | 0.33     | 120.51           | 13.02    | 0.90    | 14.47      |
| 8          | 1     | -1    | -1    | -1    | -1             | -1             | -1             | 1              | 1              | 1              | 0.33     | 0.33     | 0.33     | 0.33     | 96.66            | 9.91     | 0.61    | 16.24      |
| 9          | -1    | 1     | 1     | 1     | -1             | -1             | -1             | 1              | 1              | 1              | 0.33     | 0.33     | 0.33     | 0.33     | 110.23           | 11.35    | 1.02    | 11.13      |
| 10         | -1    | 1     | 1     | -1    | -1             | -1             | 1              | 1              | -1             | -1             | 0.33     | 0.33     | 0.33     | 0.33     | 100.67           | 9.92     | 0.63    | 15.74      |
| 11         | -1    | 1     | -1    | 1     | -1             | 1              | -1             | -1             | 1              | -1             | 0.33     | 0.33     | 0.33     | 0.33     | 116.62           | 5.43     | 0.42    | 12.92      |
| 12         | -1    | 1     | -1    | -1    | -1             | 1              | 1              | -1             | -1             | 1              | 0.33     | 0.33     | 0.33     | 0.33     | 118.36           | 9.62     | 0.66    | 14.58      |
| 13         | -1    | -1    | 1     | 1     | 1              | -1             | -1             | -1             | -1             | 1              | 0.33     | 0.33     | 0.33     | 0.33     | 115.25           | 8.81     | 0.62    | 14.21      |
| 14         | -1    | -1    | 1     | -1    | 1              | -1             | 1              | -1             | 1              | -1             | 0.33     | 0.33     | 0.33     | 0.33     | 98.93            | 9.59     | 0.59    | 16.26      |
| 15         | -1    | -1    | -1    | 1     | 1              | 1              | -1             | 1              | -1             | -1             | 0.33     | 0.33     | 0.33     | 0.33     | 100.02           | 8.64     | 0.65    | 13.29      |
| 16         | -1    | -1    | -1    | -1    | 1              | 1              | 1              | 1              | 1              | 1              | 0.33     | 0.33     | 0.33     | 0.33     | 106.46           | 13.97    | 1.11    | 12.59      |
| 17         | 2     | 0     | 0     | 0     | 0              | 0              | 0              | 0              | 0              | 0              | 3.33     | -0.67    | -0.67    | -0.67    | 126.51           | 11.59    | 0.85    | 13.64      |
| 18         | -2    | 0     | 0     | 0     | 0              | 0              | 0              | 0              | 0              | 0              | 3.33     | -0.67    | -0.67    | -0.67    | 96.70            | 7.79     | 0.62    | 12.56      |

|    |   |        |        |        |   |   |   |   |   |   |       |       |       |       |        |           |      |       |
|----|---|--------|--------|--------|---|---|---|---|---|---|-------|-------|-------|-------|--------|-----------|------|-------|
| 19 | 0 | 2      | 0      | 0      | 0 | 0 | 0 | 0 | 0 | 0 | -0.67 | 3.33  | -0.67 | -0.67 | 117.62 | 8.05      | 0.61 | 13.19 |
| 20 | 0 | -<br>2 | 0      | 0      | 0 | 0 | 0 | 0 | 0 | 0 | -0.67 | 3.33  | -0.67 | -0.67 | 116.46 | 13.1<br>6 | 0.62 | 21.23 |
| 21 | 0 | 0      | 2      | 0      | 0 | 0 | 0 | 0 | 0 | 0 | -0.67 | -0.67 | 3.33  | -0.67 | 127.43 | 13.8<br>3 | 0.67 | 20.64 |
| 22 | 0 | 0      | -<br>2 | 0      | 0 | 0 | 0 | 0 | 0 | 0 | -0.67 | -0.67 | 3.33  | -0.67 | 107.63 | 9.24      | 0.47 | 19.67 |
| 23 | 0 | 0      | 0      | 2      | 0 | 0 | 0 | 0 | 0 | 0 | -0.67 | -0.67 | -0.67 | 3.33  | 115.23 | 7.48      | 0.46 | 16.26 |
| 24 | 0 | 0      | 0      | -<br>2 | 0 | 0 | 0 | 0 | 0 | 0 | -0.67 | -0.67 | -0.67 | 3.33  | 103.16 | 9.75      | 0.53 | 18.39 |
| 25 | 0 | 0      | 0      | 0      | 0 | 0 | 0 | 0 | 0 | 0 | -0.67 | -0.67 | -0.67 | -0.67 | 143.59 | 10.2<br>0 | 0.52 | 19.62 |
| 26 | 0 | 0      | 0      | 0      | 0 | 0 | 0 | 0 | 0 | 0 | -0.67 | -0.67 | -0.67 | -0.67 | 130.25 | 8.78      | 0.48 | 18.29 |
| 27 | 0 | 0      | 0      | 0      | 0 | 0 | 0 | 0 | 0 | 0 | -0.67 | -0.67 | -0.67 | -0.67 | 137.89 | 11.3<br>8 | 0.70 | 16.26 |
| 28 | 0 | 0      | 0      | 0      | 0 | 0 | 0 | 0 | 0 | 0 | -0.67 | -0.67 | -0.67 | -0.67 | 142.57 | 10.0<br>8 | 0.39 | 25.84 |
| 29 | 0 | 0      | 0      | 0      | 0 | 0 | 0 | 0 | 0 | 0 | -0.67 | -0.67 | -0.67 | -0.67 | 150.26 | 9.03      | 0.40 | 22.57 |
| 30 | 0 | 0      | 0      | 0      | 0 | 0 | 0 | 0 | 0 | 0 | -0.67 | -0.67 | -0.67 | -0.67 | 162.35 | 9.06      | 0.42 | 21.56 |
| 31 | 0 | 0      | 0      | 0      | 0 | 0 | 0 | 0 | 0 | 0 | -0.67 | -0.67 | -0.67 | -0.67 | 170.42 | 8.83      | 0.50 | 17.65 |
| 32 | 0 | 0      | 0      | 0      | 0 | 0 | 0 | 0 | 0 | 0 | -0.67 | -0.67 | -0.67 | -0.67 | 150.21 | 8.02      | 0.39 | 20.56 |
| 33 | 0 | 0      | 0      | 0      | 0 | 0 | 0 | 0 | 0 | 0 | -0.67 | -0.67 | -0.67 | -0.67 | 149.24 | 9.50      | 0.57 | 16.67 |
| 34 | 0 | 0      | 0      | 0      | 0 | 0 | 0 | 0 | 0 | 0 | -0.67 | -0.67 | -0.67 | -0.67 | 146.52 | 8.43      | 0.41 | 20.56 |
| 35 | 0 | 0      | 0      | 0      | 0 | 0 | 0 | 0 | 0 | 0 | -0.67 | -0.67 | -0.67 | -0.67 | 130.52 | 10.2<br>1 | 0.49 | 20.83 |
| 36 | 0 | 0      | 0      | 0      | 0 | 0 | 0 | 0 | 0 | 0 | -0.67 | -0.67 | -0.67 | -0.67 | 155.67 | 10.9<br>9 | 0.56 | 19.63 |

## 98 Results

### 99 Yield respond to N, P, and K fertilizers and water

100 After a significance test on regression coefficients and regression formulas, the equation that governs the effect of N ( $x_1$ ), P ( $x_2$ ),  
101 K ( $x_3$ ), and water ( $x_4$ ) on yield ( $y_1$ ) is formulated as follows:

$$102 \quad y_1 = 125.35 + 6.62x_1 + 0.85x_2 + 4.10x_3 + 4.35x_4 - 2.03x_1x_2 + 5.72x_1x_3 + 2.80x_1x_4 - 3.81x_2x_3 -$$

$$103 \quad 1.17x_2x_4 + 2.43x_3x_4 - 8.85x_1^2 - 7.49x_2^2 - 7.37x_3^2 - 9.45x_4^2 \quad (R^2 = 0.87). \quad (1)$$

104 ANOVA results are shown in Table 5. The regression was significant at the 0.01 probability ( $F = 10.29 > F_{0.01}(14, 21) = 3.07$ ),  
105 indicating that the regression model was a good fit for the experimental data. The F-value for the lack-of-fit test was 0.13. This  
106 value was less than the significant value at the 0.05 probability ( $F_{0.05}(10, 11) = 2.85$ ), which was insignificant; the regression

107 model was relatively suitable. Therefore, this regression model could be used to evaluate the effects of N, P, and K fertilizers on  
 108 the ‘Hongyan’ strawberry yield.

109 **Table 5. ANOVA table of effects of N (x1), P (x2), K (x3), and water (x4) on yield (y1).**

| Source of variance | df    | SS       | MS      | F-value | Significance |
|--------------------|-------|----------|---------|---------|--------------|
| $x_1$              | 1.00  | 1051.26  | 1051.26 | 12.74   | **           |
| $x_2$              | 1.00  | 17.24    | 17.24   | 0.21    | ns           |
| $x_3$              | 1.00  | 402.62   | 402.62  | 4.88    | *            |
| $x_4$              | 1.00  | 454.31   | 454.31  | 5.51    | *            |
| $x_1x_2$           | 1.00  | 65.69    | 65.69   | 0.80    | ns           |
| $x_1x_3$           | 1.00  | 522.81   | 522.81  | 6.34    | *            |
| $x_1x_4$           | 1.00  | 125.89   | 125.89  | 1.53    | ns           |
| $x_2x_3$           | 1.00  | 232.41   | 232.41  | 2.82    | ns           |
| $x_2x_4$           | 1.00  | 21.81    | 21.81   | 0.26    | ns           |
| $x_3x_4$           | 1.00  | 94.28    | 94.28   | 1.14    | ns           |
| $x_1^2$            | 1.00  | 2506.56  | 2506.56 | 30.38   | **           |
| $x_2^2$            | 1.00  | 1796.00  | 1796.00 | 21.77   | **           |
| $x_3^2$            | 1.00  | 1737.75  | 1737.75 | 21.06   | **           |
| $x_4^2$            | 1.00  | 2859.44  | 2859.44 | 34.66   | **           |
| Regression         | 14.00 | 11888.07 | 849.15  | 10.29   | **           |
| Residual           | 21.00 | 1732.65  | 82.51   |         |              |
| Lack of fit        | 10.00 | 183.29   | 18.33   | 0.13    | ns           |
| Error              | 11.00 | 1549.35  | 140.85  |         |              |
| Total              | 35.00 | 13620.72 |         |         |              |

110  $F_{0.05}(1, 21) = 4.32$ ,  $F_{0.01}(1, 21) = 8.02$ ,  $F_{0.05}(14, 21) = 2.20$ ,  $F_{0.01}(14, 21) = 3.07$ ,  $F_{0.05}(14, 21) = 2.20$ ,  $F_{0.05}(10, 11) = 2.85$ ,  
 111  $F_{0.01}(10, 11) = 4.54$ .

112 \* and \*\* are significant at the 0.05 and 0.01 probability levels, respectively.

113 ns: non-significant differences.

114 As shown in Table 5, N, K, and water had a significant effect on strawberry yield, but P had no significant effect. The relative  
 115 magnitude of the effects of N, P, K, and water on yield was N>water>K>P in accordance with the absolute value of the  
 116 standardized regression coefficient. No significant interaction occurred between N×P, N×water, P×K, P×water, and K×water.  
 117 Thus, an ideal fit equation could be obtained as follows:

118 
$$y_1 = 125.35 + 6.62x_1 + 4.10x_3 + 4.35x_4 + 5.72x_1x_3 - 8.85x_1^2 - 7.49x_2^2 - 7.37x_3^2 - 9.45x_4^2. \quad (2)$$

119 From the equation above, the partial regression equations were as follows:

120 
$$y_1(x_1) = 125.35 + 6.62x_1 - 8.85x_1^2, \quad (3)$$

121 
$$y_1(x_2) = 125.35 - 7.49x_2^2, \quad (4)$$

122 
$$y_1(x_3) = 125.35 + 4.10x_3 - 7.37x_3^2, \quad (5)$$

123 
$$y_1(x_4) = 125.35 + 4.35x_4 - 9.45x_4^2, \quad (6)$$

124 The partial regression equation results showed that yield rapidly increased with an increase in N and P fertilizers at levels  
 125 below 0.37 (22.51 g/plant) and 0 (1.89 g/plant), respectively, and rapidly decreased at levels above them (Fig 3). With increasing  
 126 K fertilizer, the yield rapidly increased and then slowly decreased, and it peaked at the 0.28 (7.90 g/plant) level of K fertilizer.  
 127 When increasing water, the yield rapidly increased and then gradually decreased, and the maximum value was at the 0.23 (12.55  
 128 L/plant) level of water.

129 **Fig 3. Effects of N, P, and K fertilizers and water on the yield.**

130 The interaction effect of every two factors on yield and SSC/TA ratio are shown in Fig 4. Interaction analysis showed that  
 131 yield rapidly increased and then slowly decreased as the N fertilizer increased but slowly increased and then slowly decreased as  
 132 the P fertilizer increased. Furthermore, the maximum yield was 126.59 g/plant at 22.51 g/plant  $\text{Ca}(\text{NO}_3)_2 \cdot 4\text{H}_2\text{O}$  and 1.89 g/plant  
 133  $\text{NaH}_2\text{PO}_4$  (Fig 4(a)). Yield rapidly increased and then slowly decreased with increasing levels of N and K fertilizers, and the  
 134 maximum yield was 127.16 g/plant at 22.51 g/plant  $\text{Ca}(\text{NO}_3)_2 \cdot 4\text{H}_2\text{O}$  and 7.90 g/plant  $\text{K}_2\text{SO}_4$  (Fig 4(b)). The same trends were  
 135 obtained for N×water interaction, that is, the yield rapidly increased, slowly decreased, and reached the maximum yield of 127.09  
 136 g/plant at 22.51 g/plant  $\text{Ca}(\text{NO}_3)_2 \cdot 4\text{H}_2\text{O}$  and 12.55 L/plant water (Fig 4(c)). Similarly, for the P×K (Fig 4(d)), P×water (Fig 4(e)),  
 137 and K×water (Fig 4(f)) interactions, the yield increased and then decreased, and the maximum yields were 125.92 g/plant at 1.89  
 138 g/plant  $\text{NaH}_2\text{PO}_4$  and 7.90 g/plant  $\text{K}_2\text{SO}_4$  (Fig 4(d)), 125.85 g/plant at 1.89 g/plant  $\text{NaH}_2\text{PO}_4$  and 12.55 L/plant water (Fig 4(e)),  
 139 and 126.42 g/plant at 7.90 g/plant  $\text{K}_2\text{SO}_4$  and 12.55 L/plant water (Fig 4(f)), respectively.

140 **Fig4. Effects of interaction among N, P, and K fertilizers and water on the yield.**

141 (A) N-P interaction effect on yield with K fertilizer and water at 0 level. (B) N-K interaction effect on yield with P fertilizer  
 142 and water at 0 level. (C) N-water interaction effect on yield with P fertilizer and K fertilizer at 0 level. (D) P-K interaction  
 143 effect on yield with N fertilizer and water at 0 level. (E) P-water interaction effect on yield with N fertilizer and K fertilizer at  
 144 0 level. (F) K-water interaction effect on yield with N fertilizer and P fertilizer at 0 level

145 Frequency analysis was conducted to obtain the optimal fertilization combination for high yield (Table 6). Among 625 kinds  
 146 of fertilization combinations, 27 combinations of the four factors had a yield of more than 110 g/plant. The 99% confidence  
 147 interval for N, P, and K fertilizers and water levels were 0.314–0.871, –0.357–0.357, 0.169–0.794, and 0.000–0.592, respectively.  
 148 Therefore, when applying 22.28–24.61 g/plant  $\text{Ca}(\text{NO}_3)_2 \cdot 4\text{H}_2\text{O}$ , 1.75–2.03 g/plant  $\text{NaH}_2\text{PO}_4$ , 12.41–13.91 g/plant  $\text{K}_2\text{SO}_4$ , and  
 149 12.00–13.42 L/plant water, fruit yield will reach more than 110 g/plant with a probability of 99%.

150 **Table 6. Frequency analysis of N, P, and K fertilizers and water for strawberry yield of more than 110**  
 151 **g/plant.**

| Levels | N fertilizer |           | P fertilizer |           | K fertilizer |           | Water      |           |
|--------|--------------|-----------|--------------|-----------|--------------|-----------|------------|-----------|
|        | Sets Times   | Frequency | Sets Times   | Frequency | Sets Times   | Frequency | Sets Times | Frequency |
| -2     | 0            | 0.00      | 0            | 0.00      | 0            | 0.00      | 0          | 0.00      |
| -1     | 0            | 0.00      | 7            | 0.26      | 1            | 0.04      | 2          | 0.07      |
| 0      | 12           | 0.44      | 13           | 0.48      | 13           | 0.48      | 15         | 0.56      |



|                                 |             |      |              |      |             |      |             |      |
|---------------------------------|-------------|------|--------------|------|-------------|------|-------------|------|
| 1                               | 14          | 0.52 | 7            | 0.26 | 12          | 0.44 | 10          | 0.37 |
| 2                               | 1           | 0.04 | 0            | 0.00 | 1           | 0.04 | 0           | 0.00 |
| Total                           | 27          | 1    | 27           | 1    | 27          | 1    | 27          | 1    |
| Average                         | 0.593       |      | 0.000        |      | 0.481       |      | 0.296       |      |
| Standard error                  | 0.108       |      | 0.139        |      | 0.121       |      | 0.115       |      |
| 99% confidence interval         | 0.314–0.871 |      | –0.357–0.357 |      | 0.169–0.794 |      | 0.000–0.592 |      |
| Optimal Fertilization (g/plant) | 22.28–24.61 |      | 1.75–2.03    |      | 12.41–13.91 |      | 12.00–13.42 |      |

152

### 153 **SSC/TA ratio responds to N, P, and K fertilizers and water**

154 The regression equation that governs the effect on the SSC/TA ratio ( $y_2$ ) by N ( $x_1$ ), P ( $x_2$ ), K ( $x_3$ ), and water ( $x_4$ ) is formulated as  
 155 follows:

$$156 \quad y_2 = 17.30 + 1.17x_1 - 1.12x_2 + 0.77x_3 - 1.09x_4 - 0.43x_1x_2 + 0.55x_1x_3 - 0.42x_1x_4 - 0.94x_2x_3 -$$

$$157 \quad 0.61x_2x_4 - 0.19x_3x_4 - 1.97x_1^2 - 0.95x_2^2 - 0.21x_3^2 - 0.92x_4^2 \quad (R^2 = 0.72). \quad (7)$$

158 ANOVA results are shown in Table 7. The F-value for the regression model was 3.82, which was larger than  $F_{0.01}(14, 21) =$   
 159 3.07. Thus, the regression model was a good fit for the experimental data. The F-value for the lack-of-fit test was 0.66. This value  
 160 was less than the significant value at the 0.05 probability ( $F_{0.05}(10, 11) = 2.85$ ), which was insignificant. Thus, the regression  
 161 model was relatively suitable. This regression model could be used to evaluate the effects of N, P, and K fertilizers on the SSC/TA  
 162 ratio of ‘Hongyan’ strawberry fruits.

163 **Table 7. ANOVA table of effect of N, P, and K fertilizers and water on the SSC/TA ratio.**

| Source of variance | <i>df</i> | <i>SS</i> | <i>MS</i> | <i>F-value</i> | <i>Significance</i> |
|--------------------|-----------|-----------|-----------|----------------|---------------------|
| $x_1$              | 1.00      | 32.60     | 32.60     | 5.46           | *                   |
| $x_2$              | 1.00      | 30.08     | 30.08     | 5.04           | *                   |
| $x_3$              | 1.00      | 14.40     | 14.40     | 2.41           | ns                  |
| $x_4$              | 1.00      | 28.62     | 28.62     | 4.80           | *                   |
| $x_1x_2$           | 1.00      | 2.92      | 2.92      | 0.49           | ns                  |
| $x_1x_3$           | 1.00      | 4.76      | 4.76      | 0.80           | ns                  |
| $x_1x_4$           | 1.00      | 2.81      | 2.81      | 0.47           | ns                  |
| $x_2x_3$           | 1.00      | 14.12     | 14.12     | 2.37           | ns                  |
| $x_2x_4$           | 1.00      | 5.94      | 5.94      | 1.00           | ns                  |
| $x_3x_4$           | 1.00      | 0.59      | 0.59      | 0.10           | ns                  |
| $x_1^2$            | 1.00      | 124.81    | 124.81    | 20.92          | **                  |
| $x_2^2$            | 1.00      | 28.72     | 28.72     | 4.81           | **                  |

|             |       |        |       |      |    |
|-------------|-------|--------|-------|------|----|
| $x_3^2$     | 1.00  | 1.43   | 1.43  | 0.24 | ns |
| $x_4^2$     | 1.00  | 27.01  | 27.01 | 4.53 | *  |
| Regression  | 14.00 | 318.81 | 22.77 | 3.82 | ** |
| Residual    | 21.00 | 125.31 | 5.97  |      |    |
| Lack of fit | 10.00 | 47.05  | 4.70  | 0.66 | ns |
| Error       | 11.00 | 78.26  | 7.11  |      |    |
| Total       | 35.00 | 456.55 |       |      |    |

164  $F_{0.05}(1, 21) = 4.32$ ,  $F_{0.01}(1, 21) = 8.02$ ,  $F_{0.05}(14, 21) = 2.20$ ,  $F_{0.01}(14, 21) = 3.07$ ,  $F_{0.05}(14, 21) = 2.20$ ,  $F_{0.05}(10, 11) = 2.85$ ,  
 165  $F_{0.01}(10, 11) = 4.54$ .

166 \* and \*\* are significant at the 0.05 and 0.01 probability levels, respectively.

167 ns: non-significant differences.

168 The N and P fertilizers and water had a significant effect on strawberry fruit's SSC/TA ratio, but the K fertilizer had no  
 169 significant effect. The relative magnitude of the effects of N, P, and K fertilizers and water on the SSC/TA ratio was  
 170  $N > P > \text{water} > K$ , which was in accordance with the absolute value of the standardized regression coefficient. No significant  
 171 interaction occurred among N, P, K, and water in terms of the SSC/TA ratio (Table 7). Therefore, an ideal fit equation could be  
 172 obtained as follows:

$$173 \quad y_2 = 17.30 + 1.17x_1 - 1.12x_2 - 1.09x_4 - 1.97x_1^2 - 0.95x_2^2 - 0.92x_4^2. \quad (8)$$

174 From the equation above, the partial regression equations were as follows:

$$175 \quad y_2(x_1) = 17.30 + 1.17x_1 - 1.97x_1^2, \quad (9)$$

$$176 \quad y_2(x_2) = 17.30 - 1.12x_2 - 0.95x_2^2, \quad (10)$$

$$177 \quad y_2(x_4) = 17.30 - 1.09x_4 - 0.92x_4^2. \quad (11)$$

178 The partial regression equation results showed that the SSC/TA ratio rapidly increased with an increase in P and water at levels  
 179 below  $-0.59$  (1.67 g/plant) and  $-0.59$  (10.58 g/plant), respectively, and slowly decreased at levels above them (Fig 5). With  
 180 increasing N, the SSC/TA ratio gradually increased and then gradually decreased, with a maximum value at the 0.30 (22.22  
 181 g/plant) level of N.

### 182 Fig 5. Effects of N, P, and K fertilizers and water on the SSC/TA ratio.

183 The SSC/TA ratio rapidly increased and then rapidly decreased with increasing levels of N, whereas it slowly increased and  
 184 then rapidly decreased with increasing P; meanwhile, the maximum SSC/TA ratio was 17.80 at 22.22 g/plant  $\text{Ca}(\text{NO}_3)_2 \cdot 4\text{H}_2\text{O}$   
 185 and 1.67 g/plant  $\text{NaH}_2\text{PO}_4$  (Fig 6(a)). The same trend in Fig 6(a) was obtained in Fig 6(b) for the  $N \times \text{water}$  interaction, and the  
 186 maximum SSC/TA ratio was 17.80 at 22.22 g/plant  $\text{Ca}(\text{NO}_3)_2 \cdot 4\text{H}_2\text{O}$  and 10.58 L/plant water (Fig 6(b)). For the  $P \times \text{water}$   
 187 interaction, the SSC/TA ratio slowly increased and then rapidly decreased with increasing P fertilizer and water, and the  
 188 maximum SSC/TA ratio was 17.64 at 1.67 g/plant  $\text{NaH}_2\text{PO}_4$  and 10.58 L/plant water (Fig 6(c)).

### 189 Fig 6. Effects of the interaction among N, P, and K fertilizers and water on the SSC/TA ratio.

190 (A) N-P interaction effect on SSC/TA ratio with water at 0 level. (B) N-water interaction effect on SSC/TA ratio with P  
 191 fertilizer at 0 level. (C) P-water interaction effect on SSC/TA ratio with P fertilizer at 0 level.

192 Frequency analysis was performed to obtain the optimal fertilization combination for preferable SSC/TA ratio (Table 8).  
 193 Among 625 kinds of fertilization combinations, 47 combinations of the three factors were available with strawberry fruit's  
 194 SSC/TA ratio varying between 8.5 and 14. The 99% confidence interval for N, P, and water levels were 0.101–0.962, –0.663–  
 195 0.407, and –0.650–0.437, respectively. Thus, when applying 21.38–24.99 g/plant  $\text{Ca}(\text{NO}_3)_2 \cdot 4\text{H}_2\text{O}$ , 1.64–2.04 g/plant  $\text{NaH}_2\text{PO}_4$ ,  
 196 and 10.44–13.05 L/plant water, the fruit SSC/TA ratio will reach 8.5–14 with a probability of 99%.

197 **Table 8. Frequency analysis of N, P, and water for strawberry fruit's SSC/TA ratio of 8.5–14.**

| Levels                          | N fertilizer |           | P fertilizer |           | Water        |           |
|---------------------------------|--------------|-----------|--------------|-----------|--------------|-----------|
|                                 | Sets Times   | Frequency | Sets Times   | Frequency | Sets Times   | Frequency |
| -2                              | 0            | 0.00      | 12           | 0.26      | 12           | 0.26      |
| -1                              | 12           | 0.26      | 8            | 0.17      | 8            | 0.17      |
| 0                               | 11           | 0.23      | 8            | 0.17      | 8            | 0.17      |
| 1                               | 11           | 0.23      | 12           | 0.26      | 11           | 0.23      |
| 2                               | 13           | 0.28      | 7            | 0.15      | 8            | 0.17      |
| Total                           | 47           | 1         | 47           | 1         | 47           | 1         |
| Average                         | 0.532        |           | -0.128       |           | -0.106       |           |
| Standard error                  | 0.167        |           | 0.208        |           | 0.211        |           |
| 99% confidence interval         | 0.101–0.962  |           | -0.663–0.407 |           | -0.650–0.437 |           |
| Optimal Fertilization (g/plant) | 21.38–24.99  |           | 1.64–2.04    |           | 10.44–13.05  |           |

198

## 199 **Optimal fertilization combination for both high yield and best quality**

200 In accordance with the intersection calculation of the optimal fertilization combination for high yield and best quality, the best  
 201 fertilization combinations for high yield (more than 110 g/plant) and best fruit SSC/TA ratio (8.5–14) were 22.28–24.61 g/plant  
 202  $\text{Ca}(\text{NO}_3)_2 \cdot 4\text{H}_2\text{O}$ , 1.75–2.03 g/plant  $\text{NaH}_2\text{PO}_4$ , 12.41–13.91 g/plant  $\text{K}_2\text{SO}_4$ , and 12.00–13.05 L/plant water.

## 203 **Discussion**

204 Currently, market intermediaries pay considerable attention to fruit quality to enhance profits by meeting consumers'  
 205 preferences of sweetness [11,42], and the SSC/TA ratio has been widely used as a reliable predictor to evaluate the strawberry  
 206 flavor of sweetness and sourness. Strawberries are sweeter if their SSC/TA ratio is high than if their SSC/TA ratio is low  
 207 [12,15,28,43,44]. The minimum SSC/TA ratio for acceptable flavor is 8.75 [45], and people prefer the taste of cultivars 'Clery'  
 208 and 'Daroyal', which have high SSC/TA ratios of 9.66 and 9.26, respectively [46]. The cultivar 'NCS 10-156' has an SSC/TA  
 209 ratio of 11.6, and it is believed to be more suitable for sale than other cultivars [47]; all these SSC/TA ratios are consistent with

210 the typical range (8.5–14) for strawberries with optimal fruit quality [48,49]. In general, the SSC/TA ratio is an important  
211 parameter to evaluate fruit quality for strawberry production [50,51]. Therefore, the SSC/TA ratio was the focus of this study.  
212 Previous studies have shown that N, P, K, and water have significant effects on the yield and fruit quality of strawberry [27,52–  
213 55]. A quadratic regression orthogonal rotation combination experimental design was used to investigate the optimal fertilization  
214 and water combination for high strawberry yield and best fruit quality with optimal SSC/TA ratio. In the present work, N, P, and  
215 water had a significant effect on yield and SSC/TA ratio, whereas K had a significant on yield only. Except for the interaction  
216 between N and K having a significant effect on yield, the other interactions among the four factors had no significant effect on  
217 yield and SSC/TA ratio. The effects of the four factors on yield and SSC/TA ratio were ranked as N>water>K>P and  
218 N>P>water>K, respectively. N was the most important factor among the four factors that had a significant effect on yield and  
219 SSC/TA ratio. Thus, N was the key factor in determining the fruit yield and quality. By contrast, when application levels were  
220 above 0, P and water had a significant negative effect on the SSC/TA ratio; this result was consistent with findings of previous  
221 studies [27,56]. Excessive P suppresses SSC production and promotes TA formation, and excessive water reduces the fruits'  
222 sweetness perception.

223 The combined application of fertilizer and water should be optimized based on the interaction analysis in the present study.  
224 The yield and SSC/TA ratio increased and then decreased as two factors increased but the two other factors were fixed at 0.  
225 These trends indicated maximum or optimal values of yield and SSC/TA ratio.

226 The optimal fertilizer and water combination for high yield (>110 g/plant) and best fruit quality (SSC/TA ratio of 8.5–14) was  
227 achieved by using a quadratic regression orthogonal rotation combination experimental design and variance analysis. The optimal  
228 fertilizer and water combination was found to be 22.28–24.61 g/plant Ca (NO<sub>3</sub>)<sub>2</sub>·4H<sub>2</sub>O, 1.75–2.03 g/plant NaH<sub>2</sub>PO<sub>4</sub>, 12.41–13.91  
229 g/plant K<sub>2</sub>SO<sub>4</sub>, and 12.00–13.05 L/plant water.

## 230 Conclusion

231 N was the most important factor on yield and SSC/TA, followed by water and P. N, P, and water significantly influenced yield  
232 and SSC/TA, whereas K had a significant effect only on yield. The N×K interaction had a significant effect on yield. However,  
233 the other interactions among the four factors showed no significant effects on the yield and SSC/TA. The effects of the four  
234 factors on the yield and SSC/TA ratio were ranked as N>water>K>P and N>P>water>K, respectively. The yield and SSC/TA  
235 ratio increased and then decreased when NPK fertilizers and water increased. The optimal fertilizer and water combination for  
236 high yield (>110 g/plant) and best fruit quality (SSC/TA ratio of 8.5–14) was 22.28–24.61 g/plant Ca (NO<sub>3</sub>)<sub>2</sub>·4H<sub>2</sub>O, 1.75–2.03  
237 g/plant NaH<sub>2</sub>PO<sub>4</sub>, 12.41–13.91 g/plant K<sub>2</sub>SO<sub>4</sub>, and 12.00–13.05 L/plant water. The results obtained in this study are believed to  
238 be useful for further research on fertilization and water application in crops.

## 239 Acknowledgement

240 We thank Li Shuaishuai, Wang Hongkang and Mu Yonghang (China Agricultural University, Beijing, China) for their help in  
241 the investigation discussion, we are grateful for their helpful suggestions.

## 242 References

- 243 1. Zhang J, Balkovič J, Azevedo LB, Skalský R, Bouwman AF, Xu G, et al. Analyzing and modelling the effect of long-term  
244 fertilizer management on crop yield and soil organic carbon in China. *Sci Total Environ.* 2018;627: 361–372.  
245 doi:10.1016/j.scitotenv.2018.01.090
- 246 2. Zhang X, Xu M, Sun N, Xiong W, Huang S, Wu L. Modelling and predicting crop yield, soil carbon and nitrogen stocks  
247 under climate change scenarios with fertiliser management in the North China Plain. *Geoderma.* 2016;265: 176–186.  
248 doi:10.1016/j.geoderma.2015.11.027
- 249 3. Sauer T, Havlík P, Schneider UA, Schmid E, Kindermann G, Obersteiner M. Agriculture and resource availability in a  
250 changing world: The role of irrigation. *Water Resour Res.* 2010. doi:10.1029/2009WR007729
- 251 4. Lu Y, Song S, Wang R, Liu Z, Meng J, Sweetman AJ, et al. Impacts of soil and water pollution on food safety and health  
252 risks in China. *Environ Int.* 2015;77: 5–15. doi:10.1016/j.envint.2014.12.010
- 253 5. Zhou K, Sui Y, Xu X, Zhang J, Chen Y, Hou M, et al. The effects of biochar addition on phosphorus transfer and water  
254 utilization efficiency in a vegetable field in Northeast China. *Agric Water Manag.* 2018;210: 324–329.  
255 doi:10.1016/j.agwat.2018.08.007
- 256 6. Pan J, Liu Y, Zhong X, Lampayan RM, Singleton GR, Huang N, et al. Grain yield, water productivity and nitrogen use  
257 efficiency of rice under different water management and fertilizer-N inputs in South China. *Agric Water Manag.* 2017;184:  
258 191–200. doi:10.1016/j.agwat.2017.01.013
- 259 7. FAO. FAOSTAT-DATA-CROPS. [cited 26 Nov 2018]. Available: <http://www.fao.org/faostat/en/#data/QC>
- 260 8. Lado J, Vicente E, Manzzioni A, Ares B. Application of a check-all-that-apply question for the evaluation of strawberry  
261 cultivars from a breeding program. *J Sci Food Agric.* 2010;90: 2268–2275. doi:10.1002/jsfa.4081
- 262 9. Ulrich D, Olbricht K. Searching for chemical and sensory parameters for flavor enhancement in strawberry breeding. *Acta*  
263 *Hortic.* 2017;1156: 653–659. doi:10.17660/ActaHortic.2017.1156.95
- 264 10. Keutgen A, Pawelzik E. Modifications of taste-relevant compounds in strawberry fruit under NaCl salinity. *Food Chem.*  
265 2007;105: 1487–1494. doi:10.1016/j.foodchem.2007.05.033
- 266 11. Cao F, Guan C, Dai H, Li X, Zhang Z. Soluble solids content is positively correlated with phosphorus content in ripening  
267 strawberry fruits. *Sci Hortic (Amsterdam).* 2015;195: 183–187. doi:10.1016/j.scienta.2015.09.018
- 268 12. Ulrich D, Olbricht K. A search for the ideal flavor of strawberry - Comparison of consumer acceptance and metabolite

- 269 patterns in *Fragaria x ananassa* Duch. *J Appl Bot Food Qual.* 2016;89: 223-+. doi:10.5073/Jabfq.2016.089.029
- 270 13. Crisosto CH, Garner D, Crisosto GM, Bowerman E. Increasing “Blackamber” plum (*Prunus salicina* Lindell) consumer  
271 acceptance. *Postharvest Biol Technol.* 2004;34: 237–244. doi:10.1016/j.postharvbio.2004.06.003
- 272 14. Alavoine F, Crochon M. Taste quality of strawberry. *Acta Hortic.* 1989;265: 449– 452.  
273 doi:10.17660/ActaHortic.1989.265.68
- 274 15. Gunness P, Kravchuk O, Nottingham SM, D’Arcy BR, Gidley MJ. Sensory analysis of individual strawberry fruit and  
275 comparison with instrumental analysis. *Postharvest Biol Technol.* 2009;52: 164–172.  
276 doi:10.1016/j.postharvbio.2008.11.006
- 277 16. Li H, Lascano RJ. Deficit irrigation for enhancing sustainable water use: Comparison of cotton nitrogen uptake and  
278 prediction of lint yield in a multivariate autoregressive state-space model. *Environ Exp Bot.* 2011;71: 224–231.  
279 doi:10.1016/j.envexpbot.2010.12.007
- 280 17. Dordas CA, Sioulas C. Safflower yield, chlorophyll content, photosynthesis, and water use efficiency response to  
281 nitrogen fertilization under rainfed conditions. *Ind Crops Prod.* 2008;27: 75–85. doi:10.1016/j.indcrop.2007.07.020
- 282 18. Deng X, Woodward FI. The growth and yield responses of *Fragaria ananassa* to elevated CO<sub>2</sub> and N supply. *Ann Bot.*  
283 1998;81: 67–71. doi:10.1006/anbo.1997.0535
- 284 19. Tsialtas JT, Maslaris N. Effect of N fertilization rate on sugar yield and non-sugar impurities of sugar beets (*Beta*  
285 *vulgaris*) grown under Mediterranean conditions. *J Agron Crop Sci.* 2005;191: 330–339. doi:10.1111/j.1439-  
286 037X.2005.00161.x
- 287 20. Li H, Li T, Fu G, Hu K. How strawberry plants cope with limited phosphorus supply: Nursery-crop formation and  
288 phosphorus and nitrogen uptake dynamics. *J Plant Nutr Soil Sci.* 2014;177: 260–270. doi:10.1002/jpln.201200654
- 289 21. Grant CA, N FD, Tomasiewiz DJ, Jonston AM. The importance of early season phosphorus nutrition. *Can J Plant Sci.*  
290 2001;81: 60–73. doi:10.4141/P00-093
- 291 22. Oosterhuis DM, Loka DA, Kawakami EM, Pettigrew WT. The physiology of potassium in crop production. *Advances in*  
292 *Agronomy.* Elsevier; 2014. doi:10.1016/B978-0-12-800132-5.00003-1
- 293 23. Pettigrew WT. Potassium influences on yield and quality production for maize, wheat, soybean and cotton. *Physiol Plant.*  
294 2008;133: 670–681. doi:10.1111/j.1399-3054.2008.01073.x
- 295 24. Tsialtas IT, Shabala S, Baxevanos D, Matsi T. Effect of potassium fertilization on leaf physiology, fiber yield and quality  
296 in cotton (*Gossypium hirsutum* L.) under irrigated Mediterranean conditions. *F Crop Res.* 2016;193: 94–103.  
297 doi:10.1016/j.fcr.2016.03.010
- 298 25. Grant OM, Johnson AW, Davies MJ, James CM, Simpson DW. Physiological and morphological diversity of cultivated  
299 strawberry (*Fragaria × ananassa*) in response to water deficit. *Environ Exp Bot.* 2010;68: 264–272.  
300 doi:10.1016/j.envexpbot.2010.01.008
- 301 26. Martínez-Ferri E, Soria C, Ariza MT, Medina JJ, Miranda L, Domínguez P, et al. Water relations, growth and

- 302 physiological response of seven strawberry cultivars (*Fragaria×ananassa* Duch.) to different water availability. *Agric Water*  
303 *Manag.* 2016;164: 73–82. doi:10.1016/j.agwat.2015.08.014
- 304 27. Weber N, Zupanc V, Jakopic J, Veberic R, Mikulic-Petkovsek M, Stampar F. Influence of deficit irrigation on strawberry  
305 (*Fragaria × ananassa* Duch.) fruit quality. *J Sci Food Agric.* 2017;97: 849–857. doi:10.1002/jsfa.7806
- 306 28. Akhtar I, Rab A. Effect of Irrigation Intervals on the Quality and Storage Performance of Strawberry Fruit. *J Anim Plant*  
307 *Sci.* 2015;25: 669–678.
- 308 29. Ener SŞ. Effects of Genotype and Fertilization on Fruit Quality in Several Harvesting Periods of Organic Strawberry  
309 Plantation. 2016;5: 252–256.
- 310 30. McArthur DAJ, Eaton GW. Strawberry yield response to fertilizer, paclobutrazol and chlormequat. *Sci Hortic*  
311 (Amsterdam). 1988;34: 33–45. doi:10.1016/0304-4238(88)90073-8
- 312 31. Pokhrel B, Laursen KH, Petersen KK. Yield, Quality, and Nutrient Concentrations of Strawberry (*Fragaria × ananassa*  
313 Duch. cv. Sonata) Grown with Different Organic Fertilizer Strategies. *J Agric Food Chem.* 2015;63: 5578–5586.  
314 doi:10.1021/acs.jafc.5b01366
- 315 32. Sønsteby A, Opstad N, Myrheim U, Heide OM. Interaction of short day and timing of nitrogen fertilization on growth  
316 and flowering of “Korona” strawberry (*Fragaria × ananassa* Duch.). *Sci Hortic (Amsterdam)*. 2009;123: 204–209.  
317 doi:10.1016/j.scienta.2009.08.009
- 318 33. WANG B, LAI T, HUANG QW, YANG XM, SHEN QR. Effect of N Fertilizers on Root Growth and Endogenous  
319 Hormones in Strawberry Project supported by the National High Technology Research and Development Program (863  
320 Program) of China (No. 2004AA246080) and the Program for the Development of High-Tech Indu. *Pedosphere.* 2009;19:  
321 86–95. doi:10.1016/S1002-0160(08)60087-9
- 322 34. Bottoms TG. Nitrogen Management and Water Quality Protection in California Lettuce and Strawberry Production by  
323 THOMAS GLENN BOTTOMS B . S . ( California Polytechnic State University , San Luis Obispo ) 2008  
324 DISSERTATION Submitted in partial satisfaction of the requi. University of California, Davis. 2013.
- 325 35. Xu D, Du S, van Willigenburg LG. Optimal control of Chinese solar greenhouse cultivation. *Biosyst Eng.* 2018;171:  
326 205–219. doi:10.1016/j.biosystemseng.2018.05.002
- 327 36. Ahamed MS, Guo H, Tanino K. Development of a thermal model for simulation of supplemental heating requirements in  
328 Chinese-style solar greenhouses. *Comput Electron Agric.* 2018;150: 235–244. doi:10.1016/j.compag.2018.04.025
- 329 37. Xing M, Sun K, Liu Q, Pan L, Tu K. Development of Novel Electronic Nose Applied for Strawberry Freshness Detection  
330 during Storage. *Int J Food Eng.* 2018;0: 1–15. doi:10.1515/ijfe-2018-0111
- 331 38. Zhang C, Guo C, Liu F, Kong W, He Y, Lou B. Hyperspectral imaging analysis for ripeness evaluation of strawberry  
332 with support vector machine. *J Food Eng.* 2016;179: 11–18. doi:10.1016/j.jfoodeng.2016.01.002
- 333 39. Shao X, Wang H, Xu F, Cheng S. Effects and possible mechanisms of tea tree oil vapor treatment on the main disease in  
334 postharvest strawberry fruit. *Postharvest Biol Technol.* 2013;77: 94–101. doi:10.1016/j.postharvbio.2012.11.010

- 335 40. Liu C, Zheng H, Sheng K, Liu W, Zheng L. Effects of melatonin treatment on the postharvest quality of strawberry fruit.  
336 Postharvest Biol Technol. 2018;139: 47–55. doi:10.1016/j.postharvbio.2018.01.016
- 337 41. Yuan Y, Tan L, Xu Y, Dong J, Zhao Y, Yuan Y. Optimization of Processing Parameters for lettuce Vacuum Osmotic  
338 Dehydration Using Response Surface Methodology. Polish J Food Nutr Sci. 2018;68: 15–23. doi:10.1515/pjfn-2017-0013
- 339 42. Gallardo RK, Li H, McCracken V, Yue C, Luby J, McFerson JR. Market Intermediaries' Willingness to Pay for Apple,  
340 Peach, Cherry, and Strawberry Quality Attributes. Agribusiness. 2014;0: 1–22. doi:10.1002/agr.21396
- 341 43. Cordenunsi BR, Nascimento JRO, Lajolo FM. Physico-chemical changes related to quality of five strawberry fruit  
342 cultivars during cool-storage. Food Chem. 2003;83: 167–173. doi:10.1016/S0308-8146(03)00059-1
- 343 44. Weissinger H, Eggbauer R, Steiner I, Spornberger A, Steffek R, Altenburger J, et al. Yield and fruit quality parameters of  
344 new early-ripening strawberry cultivars in organic growing on a highly Verticillium -infested site. 14th Int Conf Org fruit  
345 Grow. 2010; 243–249.
- 346 45. PELAYO-ZALDÍVAR C, EBELER SE, KADER AA. CULTIVAR AND HARVEST DATE EFFECTS ON FLAVOR  
347 AND OTHER QUALITY ATTRIBUTES OF CALIFORNIA STRAWBERRIES. J Food Qual. 2005;28: 78–97.
- 348 46. Voca S, Dobricevic N, Dragovic-Uzelac V, Duralija B, Druzic J, Cmelik ZSB. Fruit Quality of New Early Ripening  
349 Strawberry Cultivars in Croatia. Food Technol Biotechnol. 2008;46: 292–298.
- 350 47. Perkins-Veazie P, Pattison J, Fernandez G, Ma G. Fruit Quality and Composition of Two Advanced North Carolina  
351 Strawberry Selections. Int J Fruit Sci. 2016;16: 220–227. doi:10.1080/15538362.2016.1219289
- 352 48. Montero TM, Mollá EM, Esteban RM, López-Andréu FJ. Quality attributes of strawberry during ripening. Sci Hortic  
353 (Amsterdam). 1996;65: 239–250. doi:10.1016/0304-4238(96)00892-8
- 354 49. Kafkas E, Koşar M, Paydaş S, Kafkas S, Başer KHC. Quality characteristics of strawberry genotypes at different  
355 maturation stages. Food Chem. 2007;100: 1229–1236. doi:10.1016/j.foodchem.2005.12.005
- 356 50. Rutkowski KP, Kruczynska DE, Zurawicz E. Quality and shelf life of strawberry cultivars in Poland. V Int Strawb Symp  
357 708. 2004; 329–332.
- 358 51. Wang Q, Tury E, Rekika D, Thérèse Charles M, Tsao R, Hao YJ, et al. Agronomic characteristics and chemical  
359 composition of newly developed day-neutral Strawberry lines by agriculture and agri-food Canada. Int J Food Prop.  
360 2010;13: 1234–1243. doi:10.1080/10942910903013415
- 361 52. Cronje RB, Sivakumar D, Mostert PG, Korsten L. Effect of different preharvest treatment regimes on fruit quality of  
362 litchi cultivar “Maritius.” J Plant Nutr. 2009;32: 19–29. doi:10.1080/01904160802530987
- 363 53. Milošević TM, Glišić IP, Glišić IS, Milošević NT. Cane properties, yield, berry quality attributes and leaf nutrient  
364 composition of blackberry as affected by different fertilization regimes. Sci Hortic (Amsterdam). 2018;227: 48–56.  
365 doi:10.1016/j.scienta.2017.09.013
- 366 54. Chelpiński P, Skupień K, Ochmian I. Effect of fertilization on yield and quality of cultivar kent strawberry fruit. J Elem.  
367 2010;15: 251–257.



- 368 55. Cardeñosa V, Medrano E, Lorenzo P, Sánchez-Guerrero MC, Cuevas F, Pradas I, et al. Effects of salinity and nitrogen  
369 supply on the quality and health-related compounds of strawberry fruits (*Fragaria × ananassa* cv. Primoris). *J Sci Food*  
370 *Agric.* 2015;95: 2924–2930. doi:10.1002/jsfa.7034
- 371 56. Moor U, Põldma P, Tõnutare T, Karp K, Starast M, Vool E. Effect of phosphite fertilization on growth, yield and fruit  
372 composition of strawberries. *Sci Hortic (Amsterdam)*. 2009;119: 264–269. doi:10.1016/j.scienta.2008.08.005
- 373

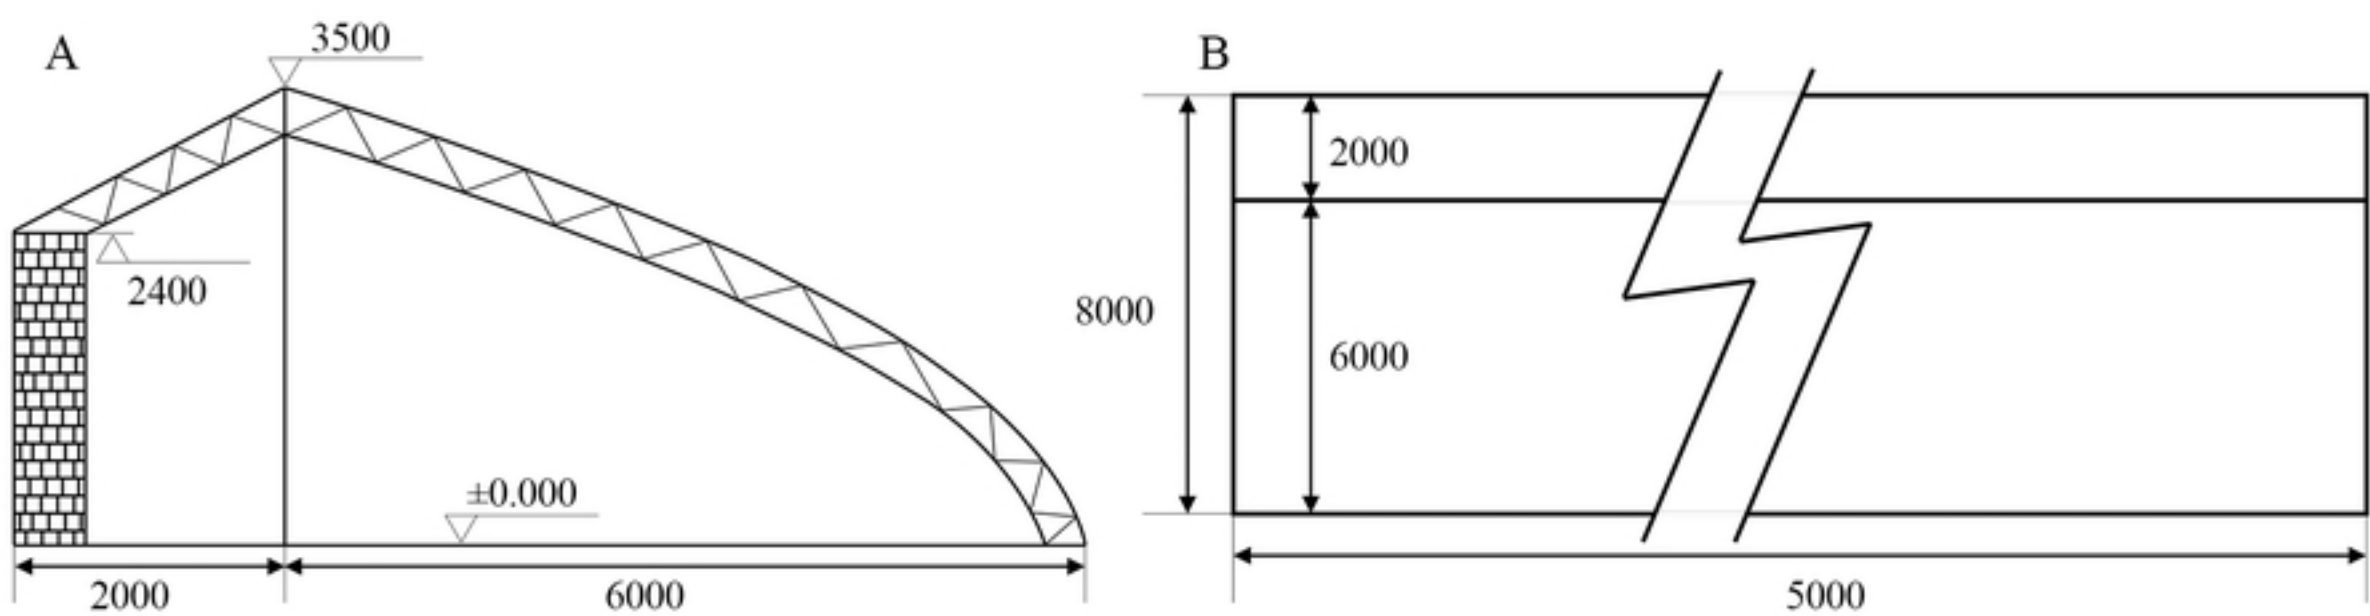

Fig1

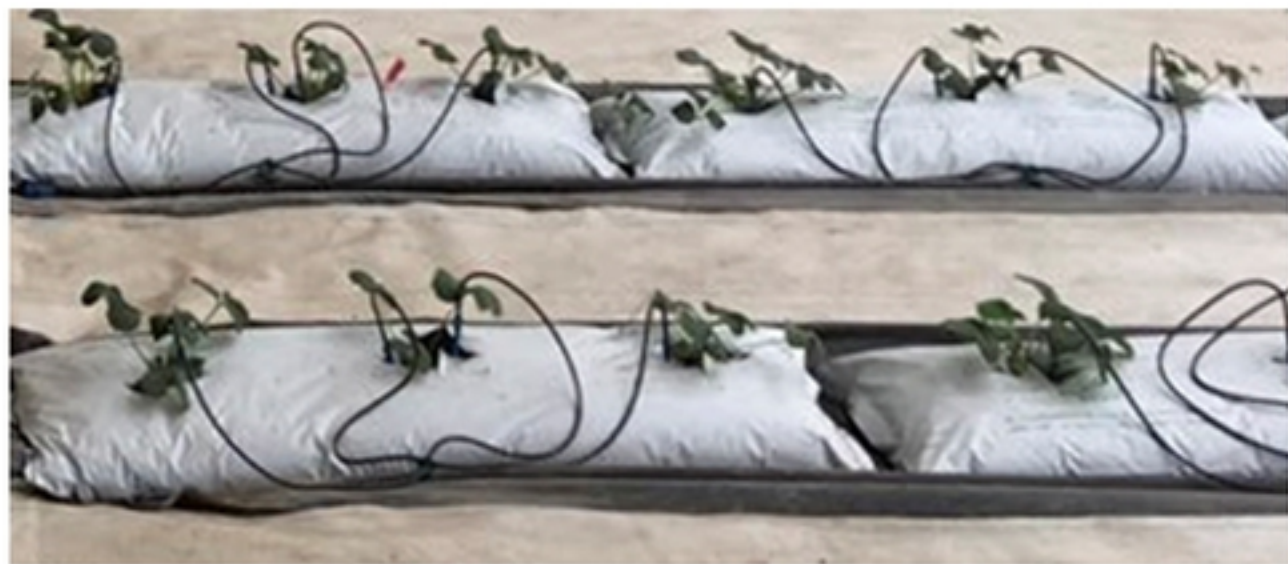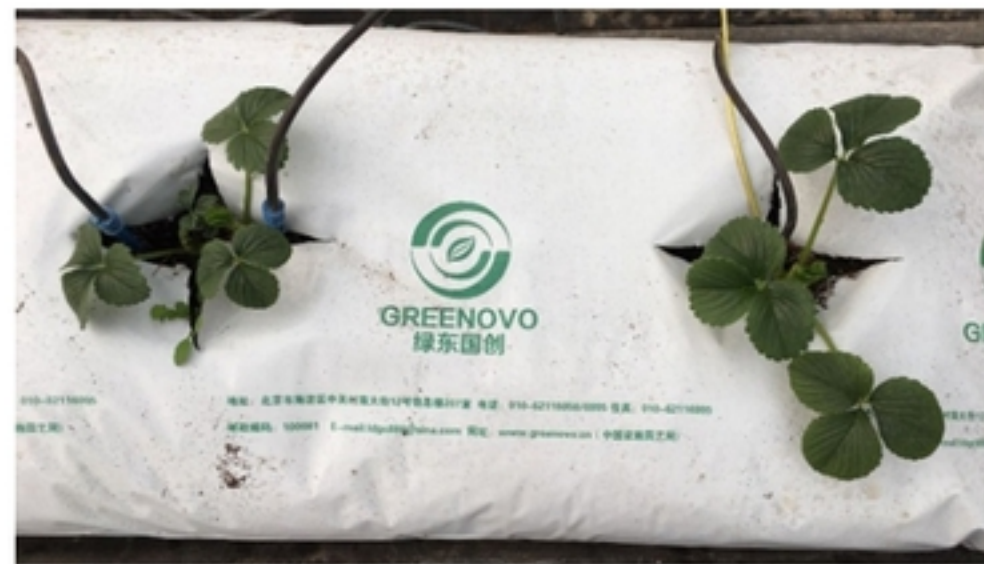

Fig2

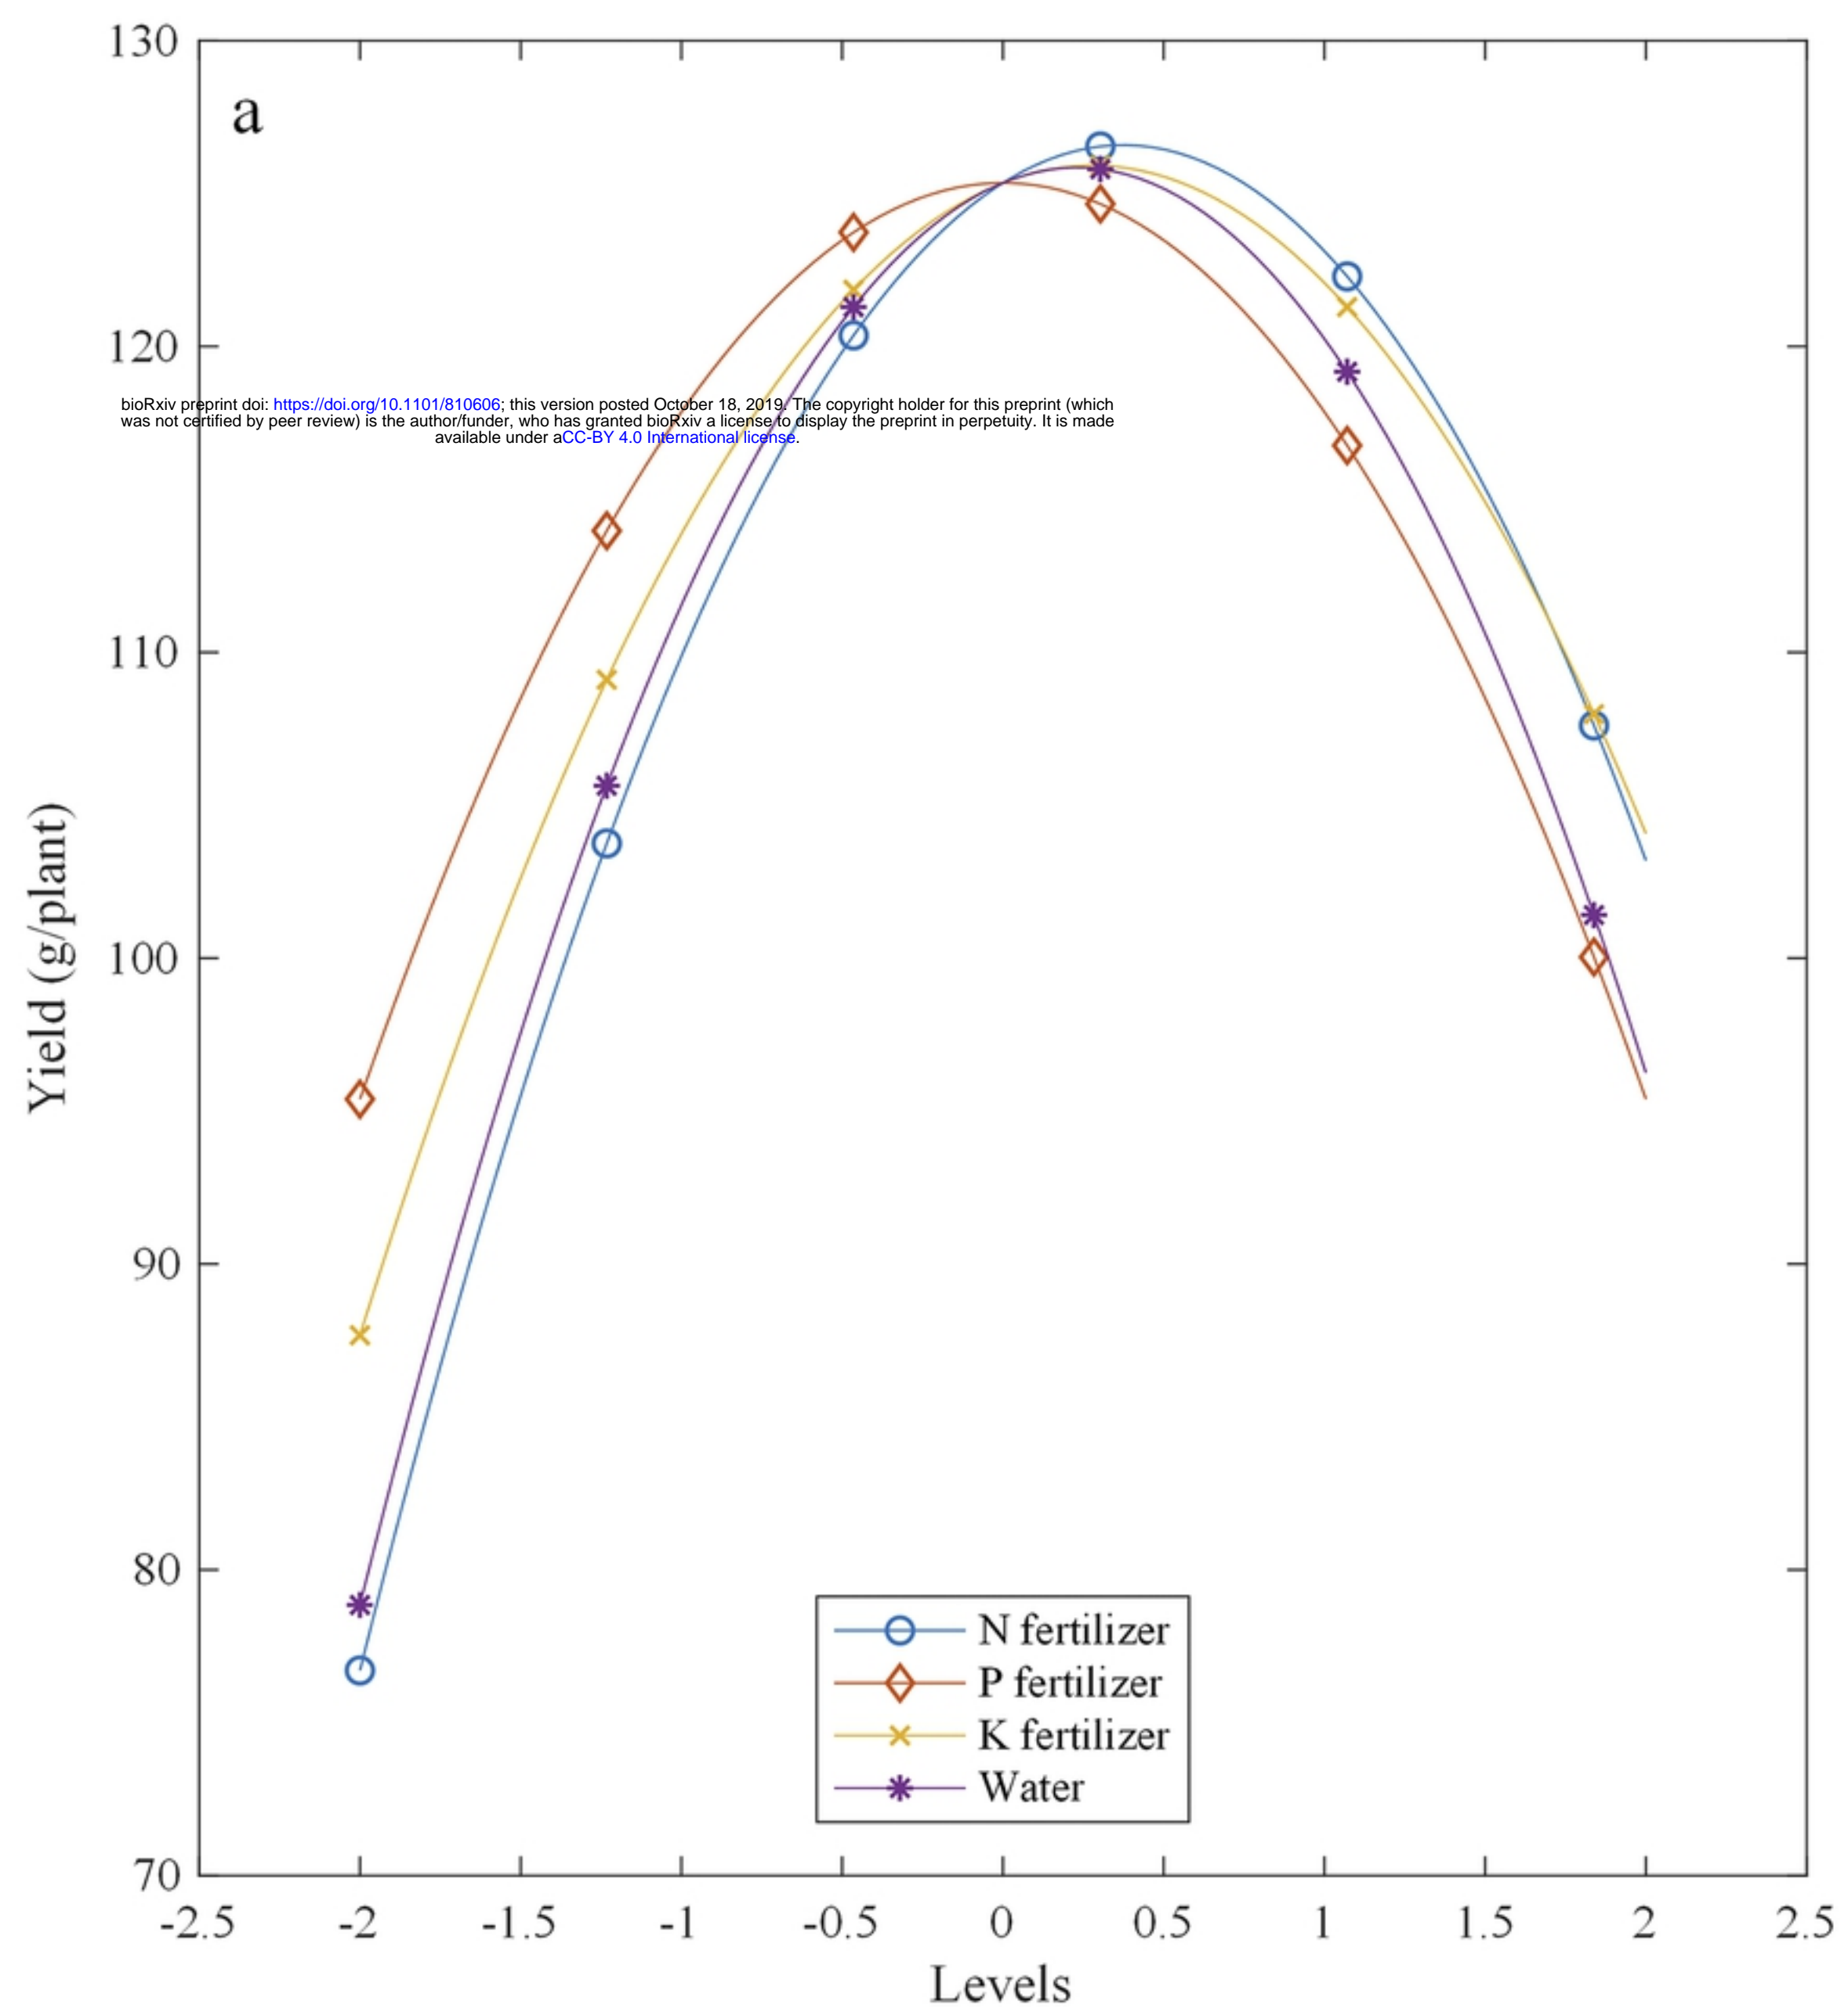

Fig3

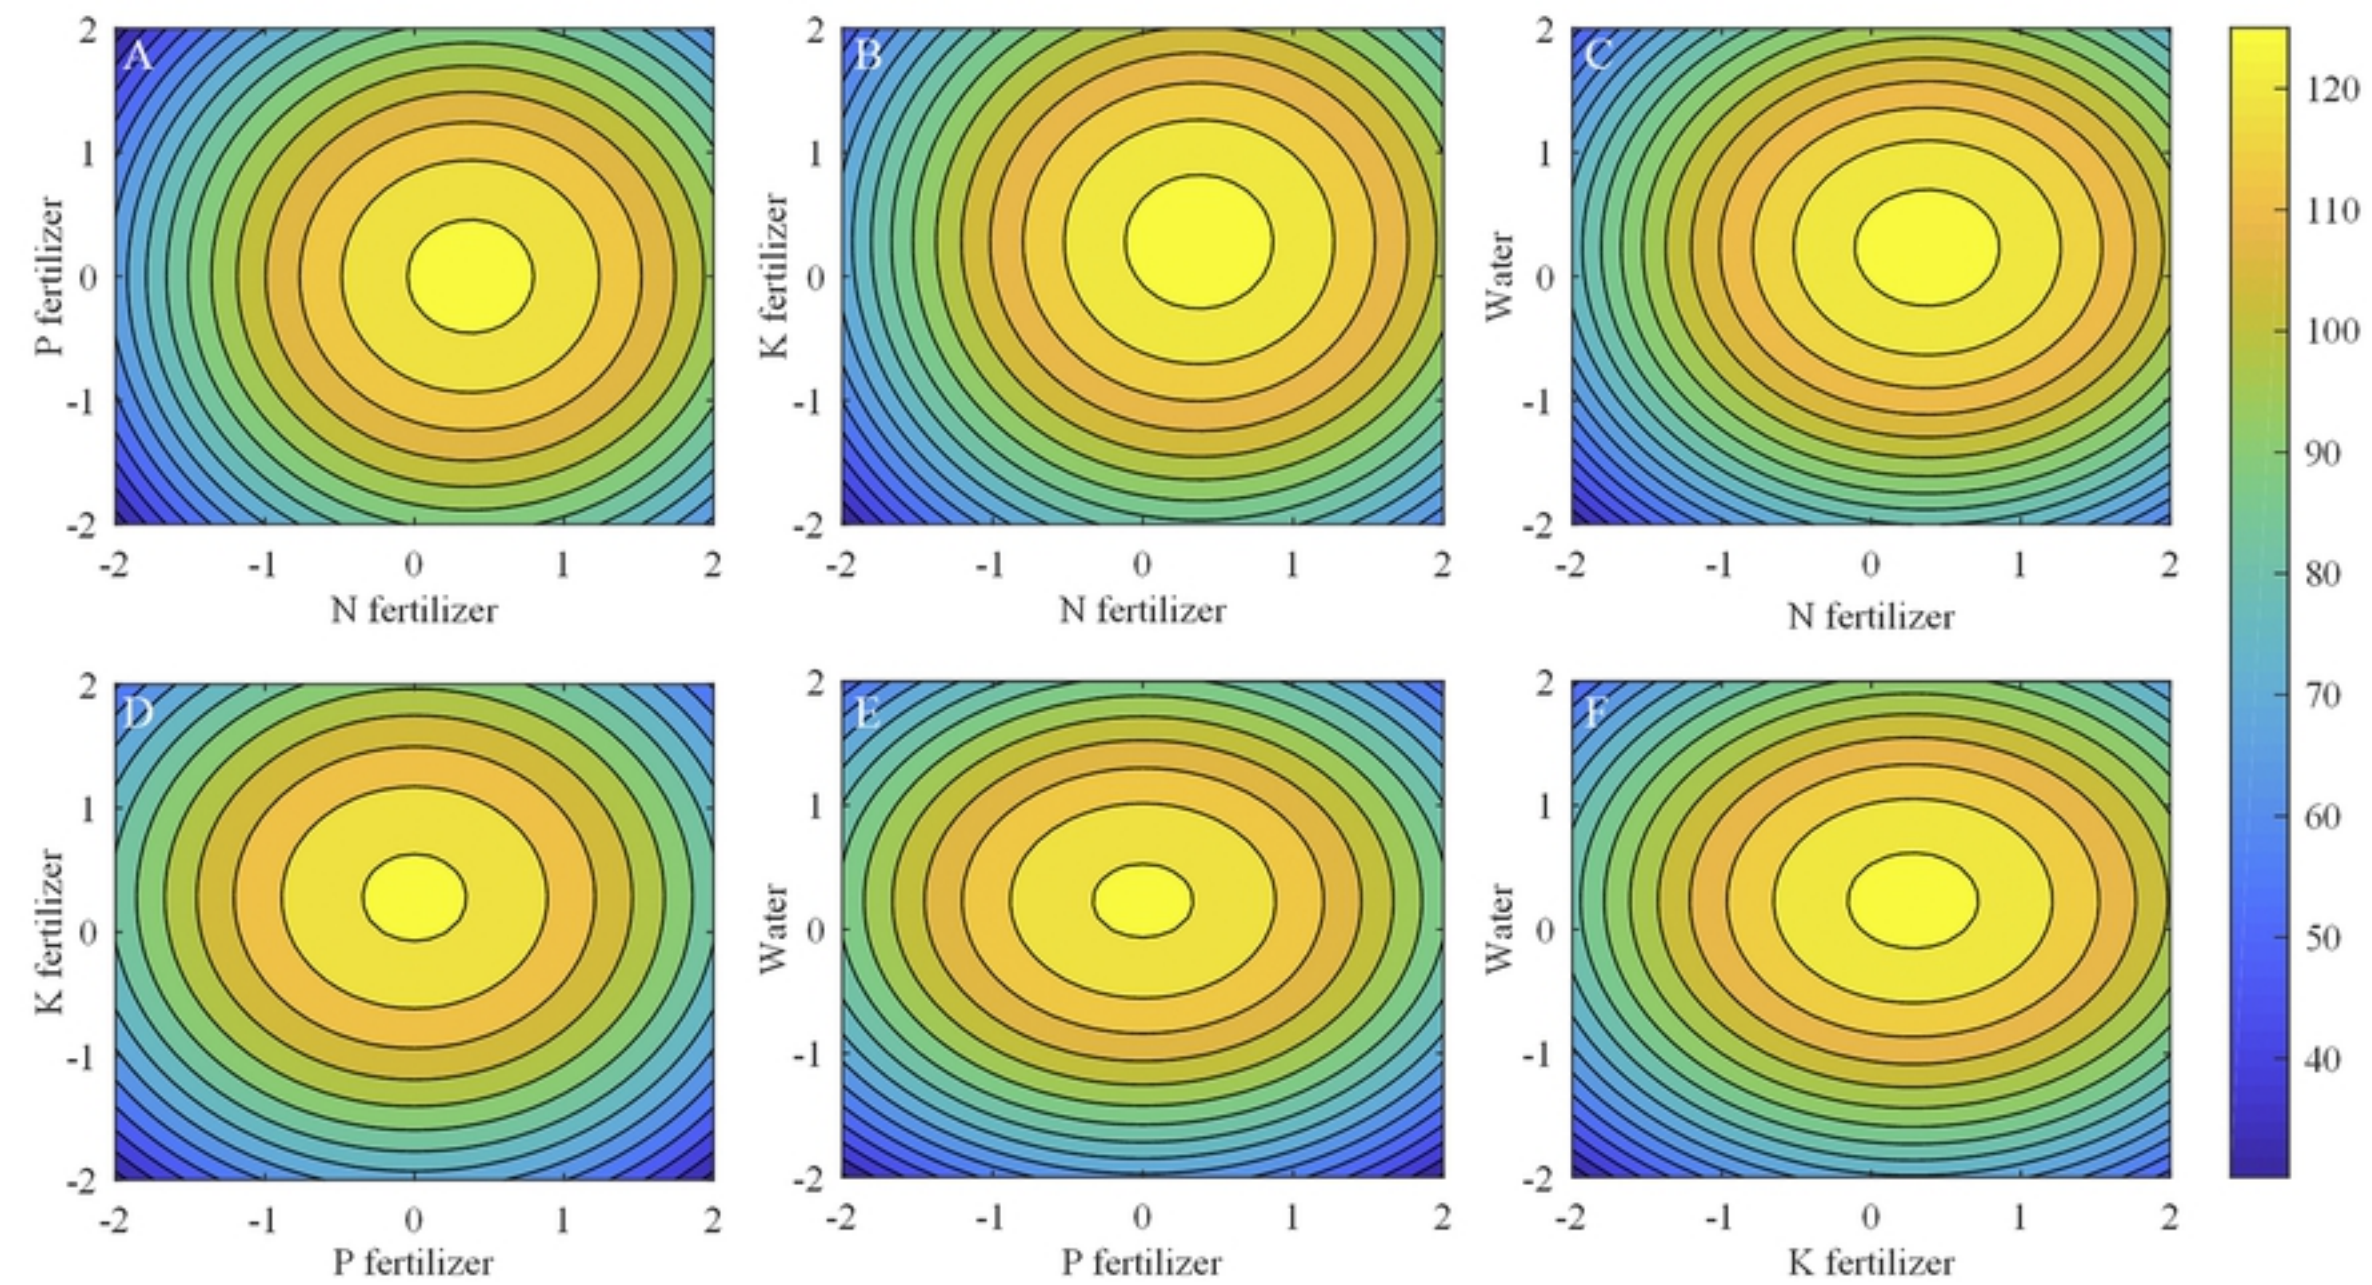

Fig4

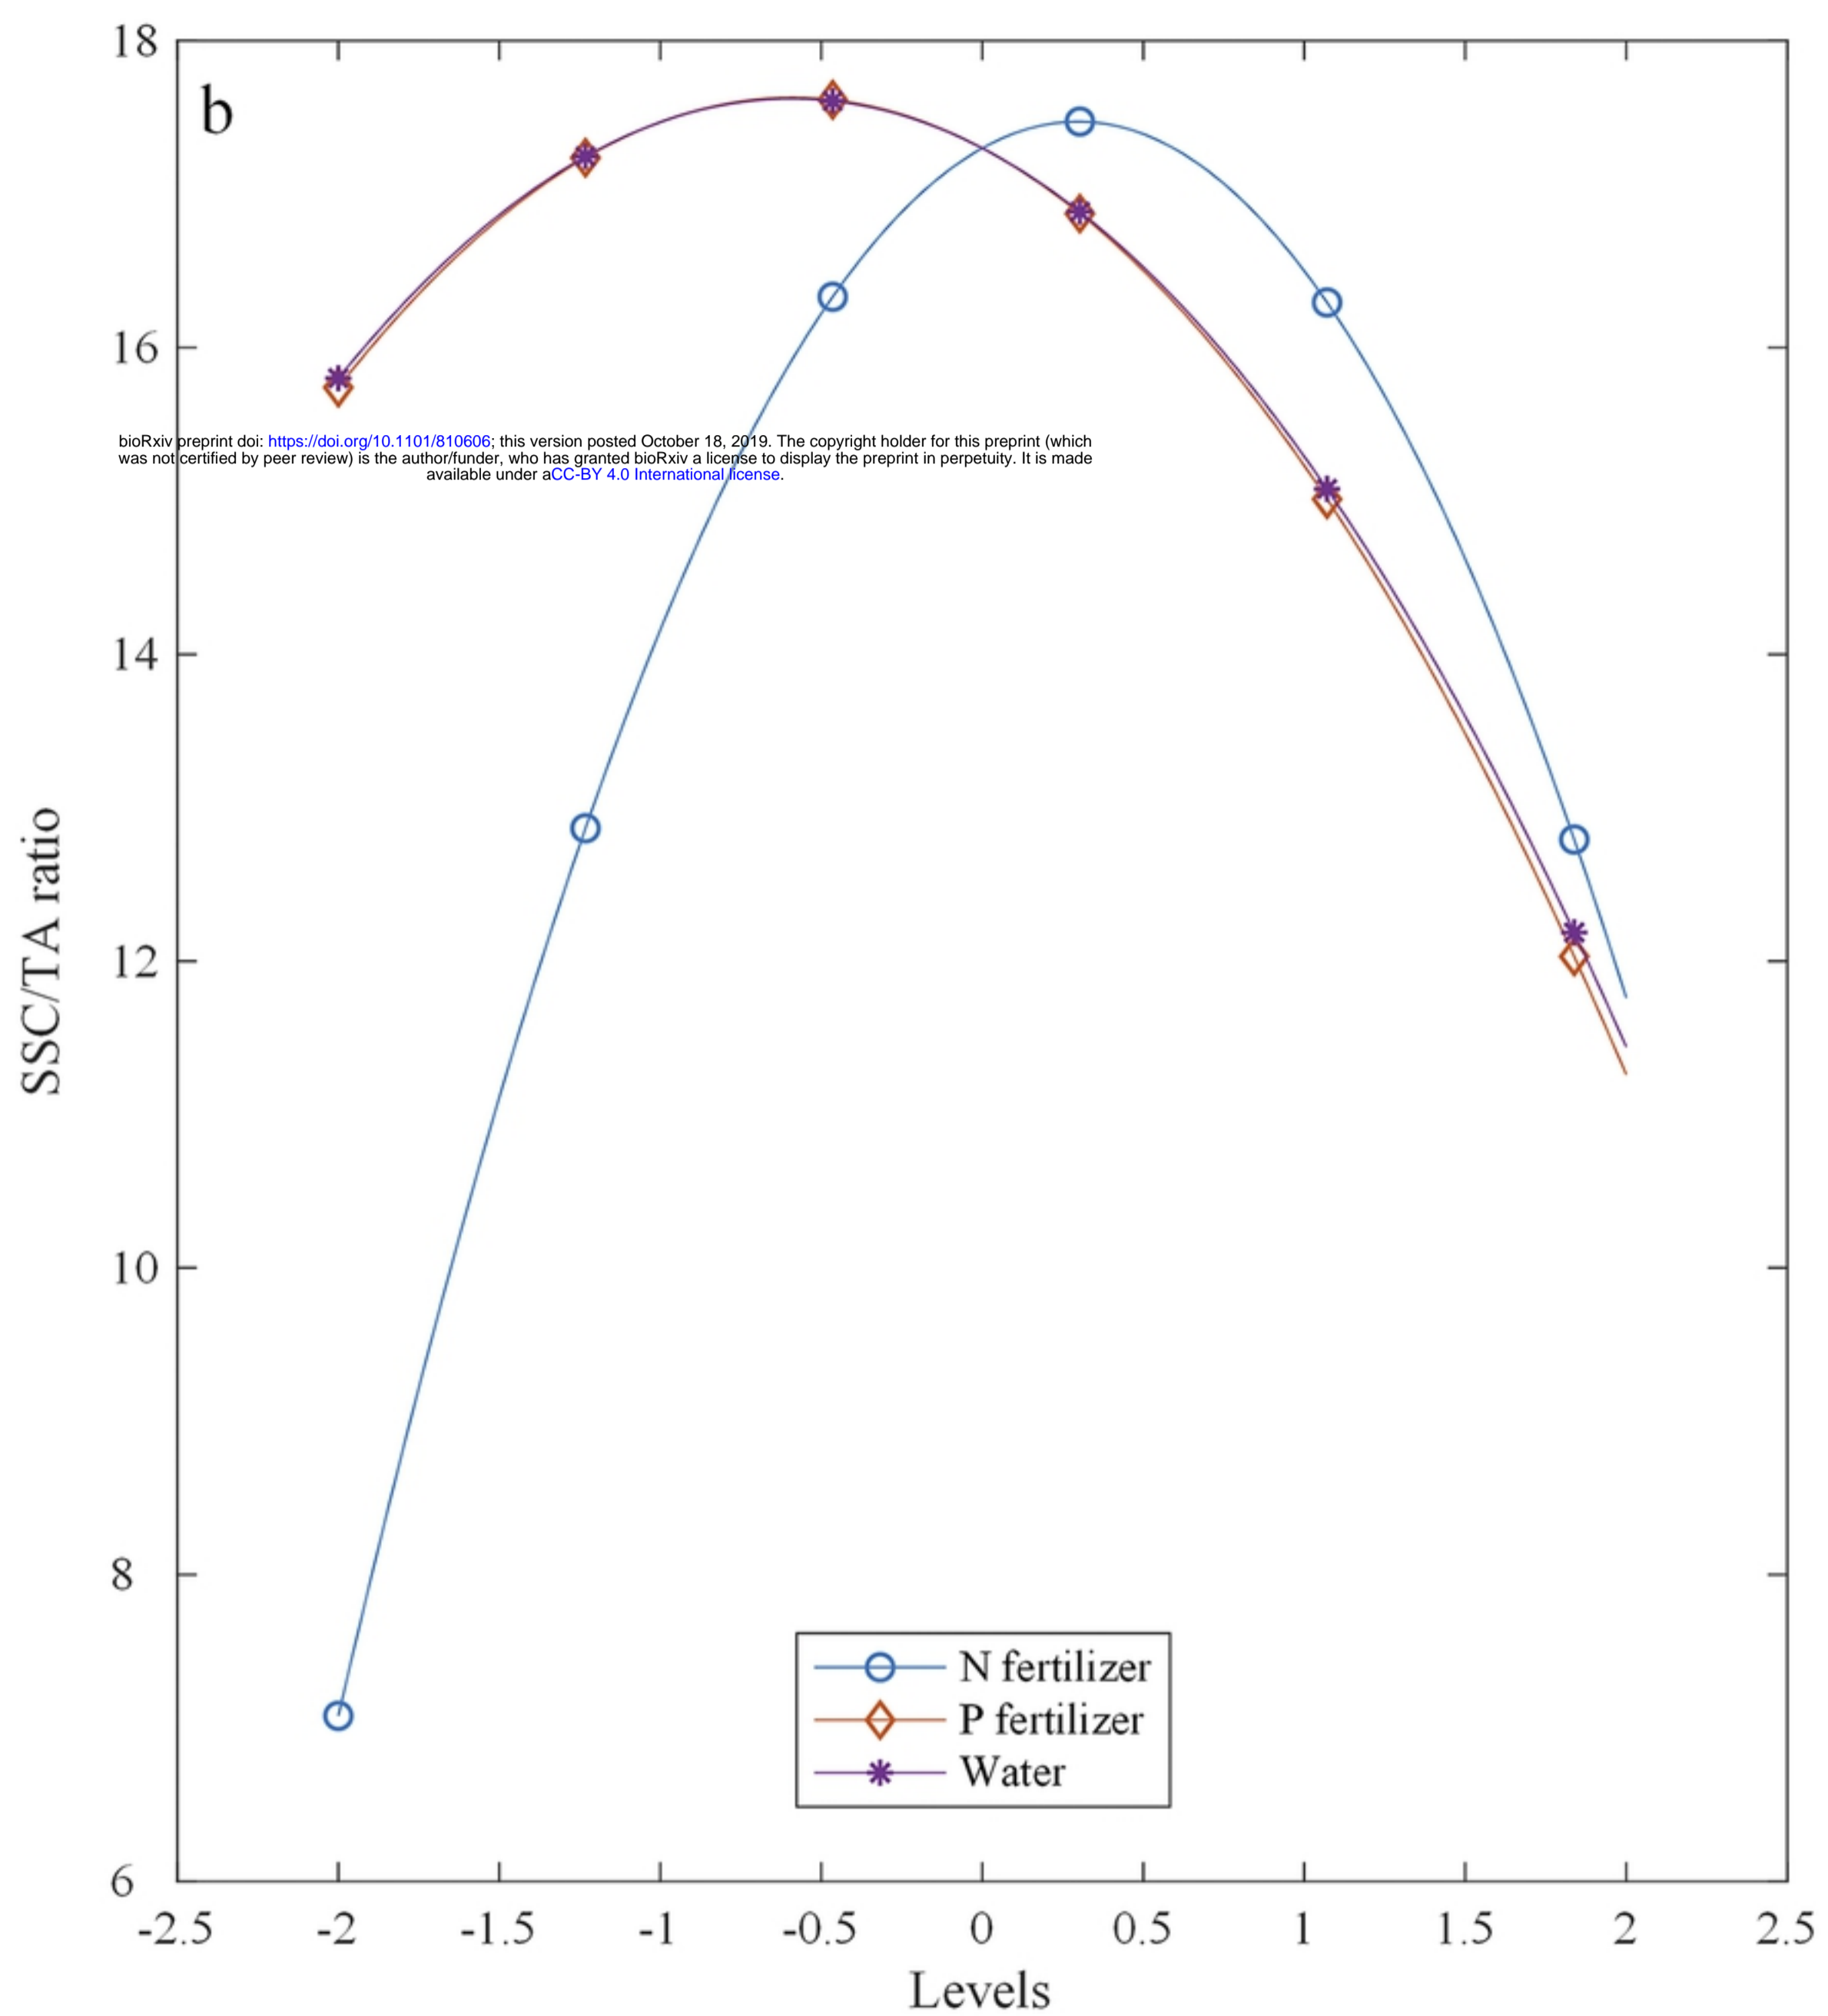

Fig5

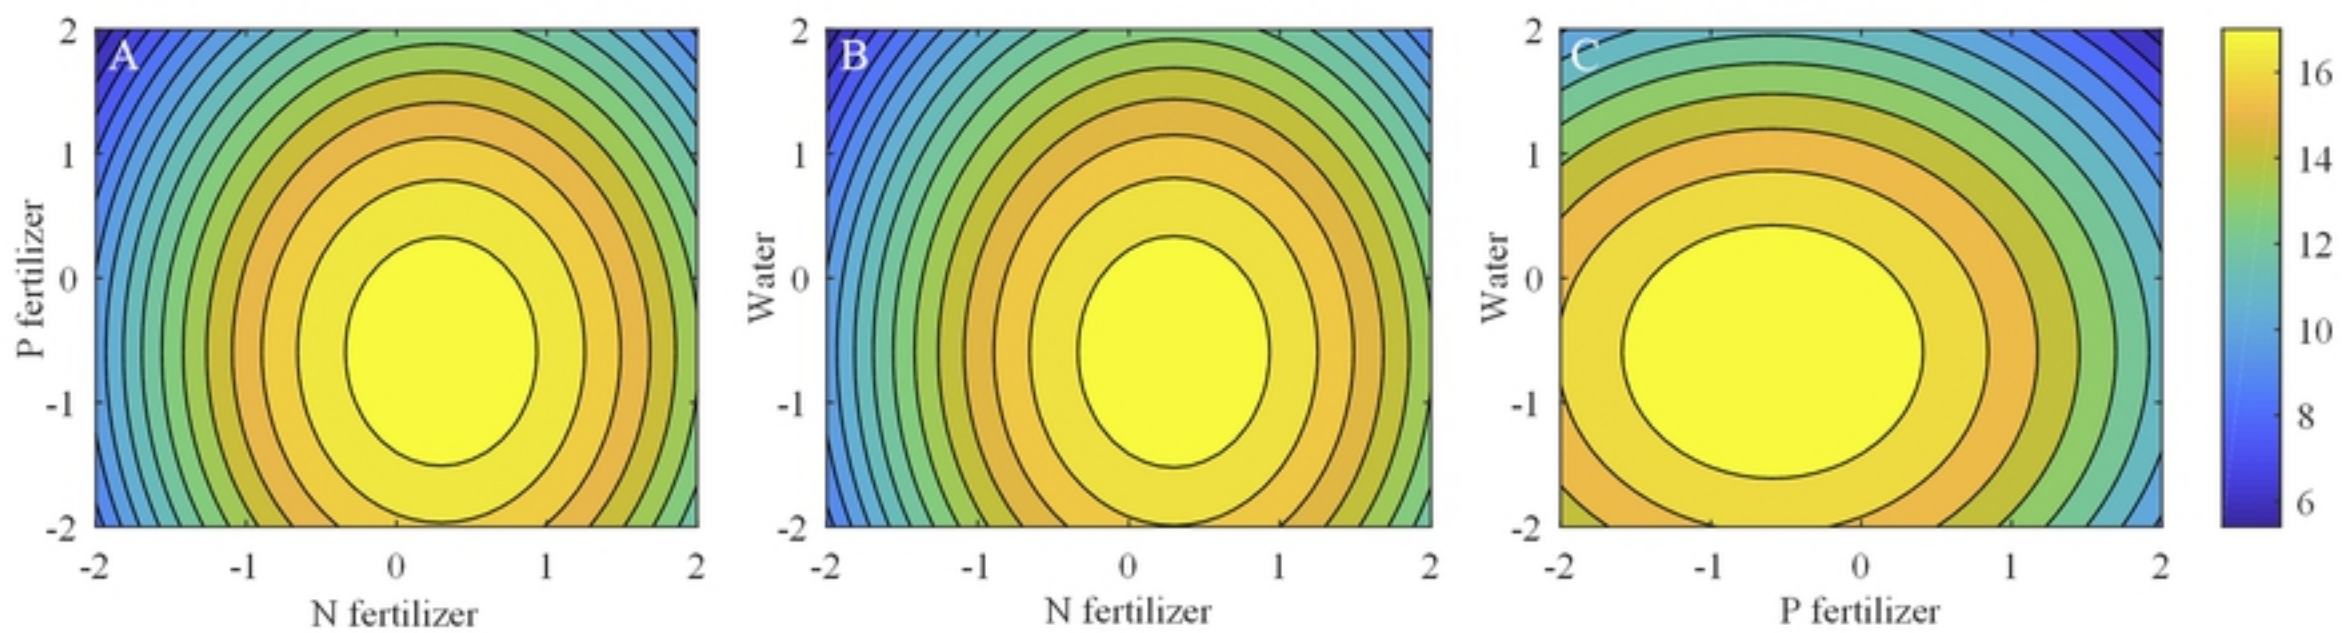

Fig6
